# Supplementary material
Source: PubMed Central journal article supplement (PMC8905525)
Supplement: NIHMS1777718-supplement-Supplemental_data.pdf [file NIHMS1777718-supplement-Supplemental_data.pdf]

# Evolutionary classification of CRISPR–Cas systems: a burst of class 2 and derived variants

*Kira S. Makarova, Yuri I. Wolf, Jaime Iranzo, Sergey A. Shmakov, Omer S. Alkhnbashi, Stan J. J. Brouns, Emmanuelle Charpentier, David Cheng, Daniel H. Haft, Philippe Horvath, Sylvain Moineau, Francisco J. M. Mojica, David Scott, Shiraz A. Shah, Virginijus Siksnys, Michael P. Terns, Česlovas Venclovas, Malcolm F. White, Alexander F. Yakunin, Winston Yan, Feng Zhang, Roger A. Garrett, Rolf Backofen, John van der Oost, Rodolphe Barrangou and Eugene V. Koonin*

<https://doi.org/10.1038/s41579-019-0299-x>

## **Evolutionary classification of CRISPR-Cas systems 2019: explosion of Class 2 and derived variants**

Makarova KS<sup>1</sup>, Wolf YI<sup>1</sup>, Iranzo J<sup>1</sup>, Shmakov SA<sup>1</sup>, Alkhnbashi OS<sup>2</sup>, Brouns SJJ<sup>3</sup>, Charpentier E<sup>4</sup>, Cheng D<sup>5</sup>, Haft DH<sup>1</sup>, Horvath P<sup>6</sup>, Moineau S<sup>7</sup>, Mojica FJM<sup>8</sup>, Scott D<sup>5</sup>, Shah SA<sup>9</sup>, Siksnyš V<sup>10</sup>, Terns MP<sup>11</sup>, Venclovas C<sup>10</sup>, White MF<sup>12</sup>, Yakunin AF<sup>13</sup>, Yan W<sup>5</sup>, Zhang F<sup>14,15,16,17</sup>, Garrett RA<sup>18</sup>, Backofen R<sup>2,19</sup>, Oost JvD<sup>20</sup>, Barrangou R<sup>21</sup>, Koonin EV<sup>1,\*</sup>

1. National Center for Biotechnology Information, National Library of Medicine, Bethesda, MD 20894
2. Bioinformatics group, Department of Computer Science, University of Freiberg, Georges-Kohler-Allee 106, 79110 Freiberg, Germany.
3. Kavli Institute of Nanoscience, Department of Bionanoscience, Delft University of Technology, Van der Maasweg 9, 2629 HZ Delft, the Netherlands
4. Max Planck Unit for the Science of Pathogens, Humboldt University, Berlin, Germany
5. Arbor Biotechnology, Cambridge, MA, USA
6. DuPont Nutrition and Health, BP10, Dangé-Saint-Romain 86220, France.
7. Département de biochimie, de microbiologie et de bio-informatique, Faculté des sciences et de génie, Groupe de recherche en écologie buccale, Félix d'Hérelle Reference Center for Bacterial Viruses, Faculté de médecine dentaire, Université Laval, Québec City, Québec, Canada
8. Departamento de Fisiología, Genética y Microbiología. Universidad de Alicante. 03080-Alicante. Spain
9. COPSAC, Copenhagen Prospective Studies on Asthma in Childhood, Herlev and Gentofte Hospital, University of Copenhagen, Ledreborg Alle 34, 2820 Gentofte, Denmark
10. Institute of Biotechnology, Vilnius University, Vilnius, Lithuania.
11. Biochemistry and Molecular Biology, Genetics and Microbiology, University of Georgia, Davison Life Sciences Complex, Green Street, Athens, GA 30602
12. Biomedical Sciences Research Complex, University of St Andrews, North Haugh, St Andrews, KY16 9TZ, UK
13. Department of Chemical Engineering and Applied Chemistry, University of Toronto, Toronto, M5S 3E5, Canada.
14. Broad Institute of MIT and Harvard, Cambridge, Massachusetts 02142, USA

15. McGovern Institute for Brain Research, Massachusetts Institute of Technology, Cambridge, MA 02139, USA

16. Howard Hughes Medical Institute, Cambridge, MA 02139

17. Department of Brain and Cognitive Sciences and Department of Biological Engineering, Massachusetts Institute of Technology, Cambridge, MA 02139

18. Archaea Centre, Department of Biology, Copenhagen University, Ole Maaløes Vej 5, DK2200 Copenhagen N, Denmark

19. BIOSS Centre for Biological Signaling Studies, Cluster of Excellence, University of Freiburg, Germany.

20. Laboratory of Microbiology, Wageningen University, Stippeneng 4, 6708 WE Wageningen, Netherlands

21. Department of Food, Bioprocessing, and Nutrition Sciences, North Carolina State University, Raleigh, NC 27606, USA.

\*For correspondence: [koonin@ncbi.nlm.nih.gov](mailto:koonin@ncbi.nlm.nih.gov)

## Supplementary Information

### Supplementary Materials and Methods

#### The Prokaryotic Genome Database

A database containing 13,116 completely assembled archaeal and prokaryotic genomes in GenBank <sup>1</sup> was downloaded from the NCBI FTP site (<ftp://ftp.ncbi.nlm.nih.gov/genomes/all/>) in March 2019. The database contains 21,395,802 protein sequences annotated in 25,485 genome partitions. All proteins were clustered using MMseqs2 <sup>2</sup> with the sequence similarity threshold of 0.75; for every pair of genomes  $i$  and  $j$  the number  $n_{i,j}$  of sequences, belonging to the same cluster, was determined, then the distances between the genomes were calculated as  $d_{i,j} = -\ln n_{i,j}/\min(n_{i,i}, n_{j,j})$ . A UPGMA (Unweighted Pair Group Method with Arithmetic mean) dendrogram was reconstructed from genome distances, then genome weights were calculated from this tree as previously described <sup>3</sup>.

#### CRISPR array detection

14,634 potential CRISPR arrays were identified in the sequence database using minCED tool (<https://github.com/ctSkennerton/minced>), derived from the CRT CRISPR recognition tool <sup>4</sup>, with default parameters.

#### Identification of Cas proteins

Protein sequences were annotated using PSI-BLAST <sup>5</sup> (e-value cutoff of  $10^{-4}$  and effective database size of  $2 \times 10^7$  amino acids). Profiles from the NCBI CDD database <sup>6</sup>, as well as a collection of previously described CRISPR-Cas protein family profiles <sup>7-10</sup> were used as queries. In addition, several profiles were constructed anew for groups of CRISPR-linked proteins that were poorly recognized with the existing profiles.

#### Alignments and phylogenetic analysis

Relationships within diverse protein families were established using the following procedure: initial sequence clusters were obtained using MMseqs2 <sup>2</sup> with the sequence similarity threshold of 0.5, and the sequences within each cluster were aligned using MUSCLE <sup>11</sup>. Alternatively, previously constructed cluster alignments were used. Then, cluster-to-cluster similarity scores were obtained using HHSEARCH <sup>12</sup> (including trivial clusters consisting of a single sequence each) and normalized by the minimum of the self-scores. Relative similarity scores were converted to distances using the  $d = -\ln s$  formula, and a UPGMA dendrogram was constructed from the distance matrix. Highly similar clusters (pairwise score to self-score ratio  $>0.05$ ) were aligned to each other using HHALIGN <sup>12</sup>, and the procedure was performed iteratively. At the last step, sequence-based trees were constructed from the cluster alignments using the

FastTree program<sup>13</sup> (WAG evolutionary model, gamma-distributed site rates) and rooted by mid-point; these trees were grafted onto the tips of the profile similarity-based UPGMA dendrogram

### **Assembly of CRISPR-*cas* genomic islands**

CRISPR-Cas genomic islands were assembled in three consecutive iterations. In each iteration, 15 ORFs flanking “anchor” *cas* genes were collected. The anchor *cas* genes were defined as genes belonging to the adaptation module (*cas1*, *cas2*, *cas4*) or the effector module (*cas3*, *cas5*, *cas6*, *cas7*, *cas8*, *cas10*, *cmr7*, *csb3*, *csx19*, *csx22*, *csx24*, *csx25*, *csx26* for Class 1; *cas9*, *cas12*, *cas13* for CRISPR-Cas Class 2). In the generated islands, CRISPR-Cas systems were identified and classified into types and subtypes using previously described procedures<sup>7,10</sup>. The annotation for Type II islands was manually corrected according to the phylogeny of *cas9*. Due to the high similarity between Type V effector proteins and the TnpB proteins encoded by transposable elements, phylogenetic analysis and manual curation were used to determine sequences that belonged to clades consisting of known type V effectors. Type VI systems were identified using both matches to the respective profiles and manual curation due to a large number of false positive hits. For the first and second iterations, all islands that were annotated as partial were manually analyzed to identify potential novel CRISPR-Cas protein families; all islands selected by this procedure were added to the island set. Temporary profiles were created for all representatives of protein families identified during the manual curation step using MAFFT<sup>14</sup>. To identify representatives of the newly detected protein families, the sequences identified during manual curation were used as PSI-BLAST search queries against the NR database<sup>15</sup>, the sequences identified with this search were clustered with MMSeqs2 (with a 0.9 cutoff for sequence similarity), and the first member of each cluster was chosen as the representative of the respective alignment. The entire procedure was iterated using the updated CRISPR-Cas profile set.

### **Bipartite gene-sharing network of CRISPR-Cas systems**

A bipartite gene-sharing network<sup>16,17</sup> of CRISPR-Cas systems was built from 2,077 representative CRISPR-Cas loci encompassing 15,198 protein sequences, which were partitioned into 4,687 protein clusters. To build the network, each protein cluster was connected to all those loci that contained at least one representative from that cluster. Conversely, every locus was connected to all those protein clusters that were represented in that locus. To facilitate the computational analysis, only non-redundant loci and protein clusters that appeared in at least 2 loci were included, yielding a network with 1,946 loci, 1,190 protein clusters, and 10,932 edges. To improve the performance of the community detection pipeline (see below), the network was split according to the classification of the loci into Class 1 and Class 2, and community detection was performed separately on each subnetwork.

Community detection in the bipartite gene-sharing network was carried out with the software MODULAR<sup>18</sup> which partitions the network into modules that maximize the bipartite modularity index<sup>19</sup>. Due to the combinatorial nature of the modularity maximization problem, programs such as MODULAR only can find approximate solutions when applied to large networks. To address this problem, a consensus clustering pipeline was implemented, which has been shown to greatly increase the

performance of modularity-based community detection approaches<sup>20</sup>. First, MODULAR was run 100 times; then, a pairwise similarity matrix was built by recording, for each pair of nodes, the fraction of runs in which both nodes were assigned to the same module; finally, hierarchical clustering of the nodes based on the pairwise similarity matrix (UPGMA method) was carried out. In the last step, the number of modules was selected such that the resulting partition maximized the bipartite modularity index. The software OSLOM<sup>21</sup>, with options ‘-singlet -r 0 -hr 0 -t 0.05’, was subsequently used to filter significant modules with a p-value threshold equal to 0.05.

## Supplementary Figures

### Supplementary Figure 1.

#### Subtype III-E CRISPR-Cas systems: Origin from subtype III-D and selected gene neighbourhoods

For each gene neighbourhood, the organism name, genome partition and coordinates of the locus are indicated. Genes are shown by block arrows, with the length roughly proportional to the size of the corresponding gene. The *cas* genes are coloured as in Figure 1. Other genes are coloured based on sequence similarity. Gene names or brief annotations are given below the arrows. White arrows correspond to genes that are apparently not related to the CRISPR-Cas function. Abbreviations: gRAMP, predicted multidomain subtype III effector; HD, HD nuclease domain; RT, reverse transcriptase; CHAT, caspase family protease (CHAT domain); TPR, tetratricopeptide repeats; zf, zinc finger; wHTH, winged helix-turn-helix domain; Y1\_Tnp, tyrosine transposase; xxx and yyy, uncharacterized proteins associated with the caspase.

A. This panel shows several variants of the subtype III-D system inside the black box, including the one from *Kyrpidia tusciae* that shows the highest similarity with the gRAMP including a unique shared insert in *Cas7* (see the domain organization of gRAMP depicted for *Candidatus Jettenia caeni* gRAMP). The III-D variant from *Kyrpidia tusciae* or a related bacterium likely gave rise to the gRAMP. Next to the arrow showing this origin, the inferred key events are described. Other subtype III-E loci from draft genomes are shown below.

B. Key motifs of the gRAMP protein (see details in **Supplementary Figure 2**).

**A**

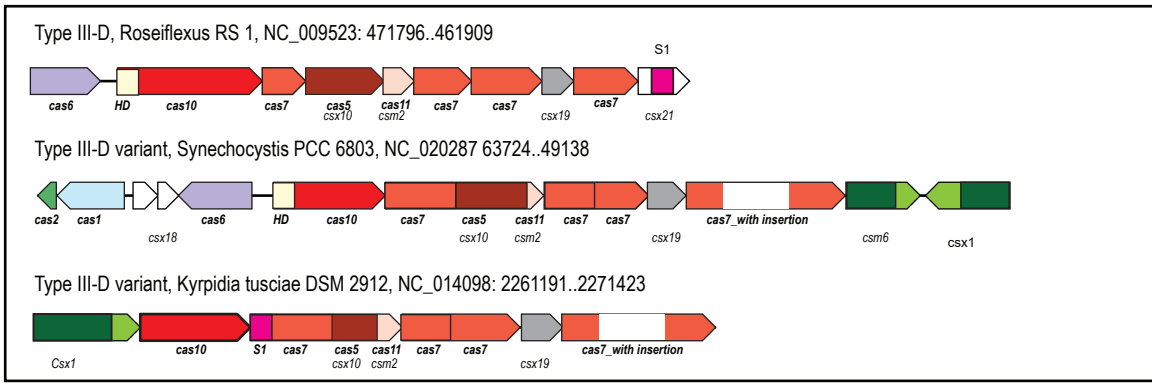

↓ Loss of large subunit (cas10), cas5 component (Csx10) and Csx19

Candidatus *Jettenia caeni*, NZ\_BAFH01000003 145445..162480

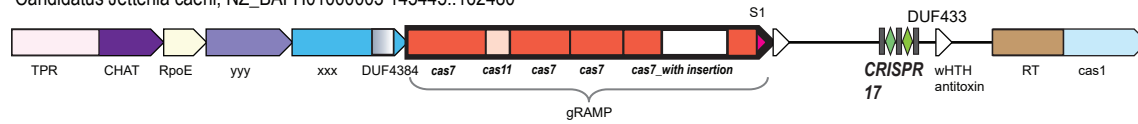

Candidatus *Scalindua brodae* JRYO01000185 18785..3184

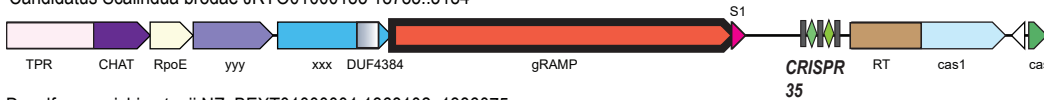

*Desulfonema ishimotonii* NZ\_BEXT01000001 1368102..1386075

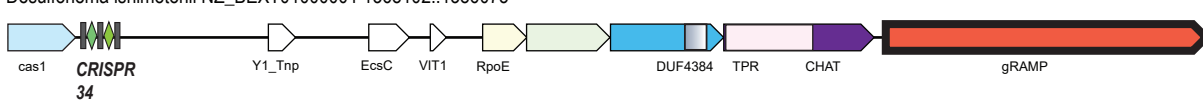

*Deltaproteobacteria bacterium RIFOXYD12\_FULL\_50\_9* MGTA01000040 8751..18503

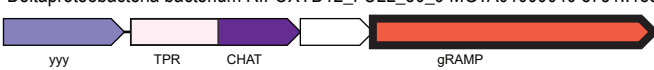

Candidatus *Brocadia fulgida* LAQJ01000233 8750..1

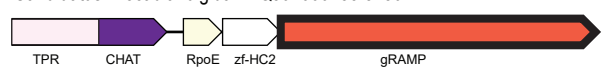

*Deltaproteobacteria bacterium QMMU01000137* 1..7221

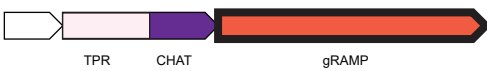

*Desulfobacteraceae bacterium 4572\_88* NBMK01000156 8364..337

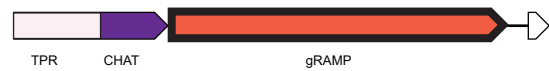

*Deltaproteobacteria bacterium QMMU01000439* 4629..49

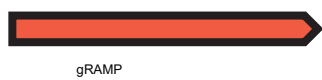

*Syntrophorhabdaceae bacterium PtaU1.Bin034* MVRP01000104 9795..3263

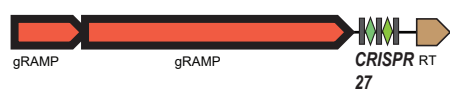

Candidatus *Magnetomorum* sp. HK-1 JPDT01001326 12502..7529

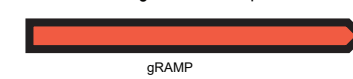

**B**

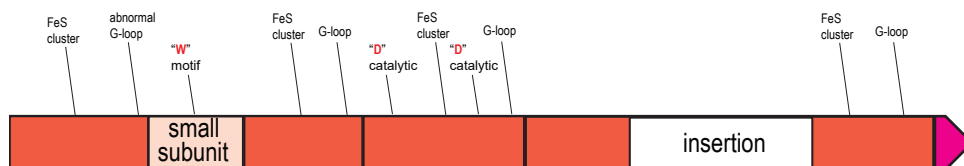

**gRAMP (III-E)**

WP\_007220849.1 *Candidatus Jettenia caeni*



## Supplementary Figure 2

### **Multiple alignment and HHpred outputs for gRAMP (giant RAMP), the predicted effector module of subtype III-E systems.**

Selected representatives of the gRAMP (predicted III-E effector) family were aligned using MUSCLE and colored using [http://www.bioinformatics.org/sms2/color\\_align\\_cons.html](http://www.bioinformatics.org/sms2/color_align_cons.html) server with default amino acid groups with 90% consensus. Domains and catalytic residues are colored according to the scheme explained above the alignment.

The standard HHpred server (<https://toolkit.tuebingen.mpg.de/#/tools/hhpred>) output is shown. The search was done with OQY58162.1 protein as a query. The catalytic residues are highlighted.

**Domain 1** - Csm3-like (group 7 RAMP) with abnormal "G-rich" loop  
**Domain 2** - putative small subunit (no sequence similarity but there is a conserved "W" and four large alpha helices predicted by Jpred in this region)  
**Domain 3** - Csm3-like (group 7 RAMP), could be catalytic  
**Domain 4** - Csm4-like (group 7 RAMP), red - catalytic aspartates based on Zhu X, Ye K. Nucleic Acids Res. 2015 Jan;43(2):1257-67; <https://doi.org/10.1093/nar/gku1355>)

**Domain 5** - Csm3-like with large insertion or subdomain (group 7 RAMP)

**Domain 6** - Cold shock protein-like domain (RNA-binding OB-fold)

G-rich loop

**Fe-S clusters** - conserved cysteines

```
OGR07205.1 -----MTKKP-----
PDWI01005922_5 MIPDLRSLVVHISFLTPLYRQAPWFPPEKRRNNNRDWRMQSYARWHKVAPE--EGH-----PFITGTLRSRVARVEEELCLLANGIWRGVACCPGEF---NSQAKKPK-----HLRRRTTLQWYPEGAKS-CS-KQDGRNACP
KHE91659.1 -----MNITVELTFPEPYRLVEVFDWDARKKSHS-AMRQQAFAQWTWKGKRTAGK-----SFITGTLRSRVARVEEELCLLANGIWRGVACCPGEF---QTDESQKPKS-----FLRKRHTLQWQAN-NKNIC-----DKEACP
KKO18793.1 MSKTDKIDIKLTFLEPYRMVNWLENGLRMTDPR-YLRGLSFARWH-RNKNGKAGR-----PYITGTLRSRVARVEEELCLLANGIWRGVACCPGEF---ETEREMRKNK-----FLRRRPTPAWSAETKKEIC-----TTHGSACA
WP_007220849.1 ---MHTILPIHLTFLEPYRLAEWHAKADRRKKNR-YLRGMSFAQWH-KDKDG-IGK-----PYITGTLRSRVARVEEELCLLANGIWRGVACCPGEF---ETEKD---KPA-----VLRKRPTIQWKTG-RPATCDPEKQEKKDACP
OQY58162.1 -----MKITLRFLEPFRMLDWIRPEERISGNKAFQGLTFARWH-KSKADDKGGK-----PFITGTLRSRVARVEEELCLLANGIWRGVACCPGEF---MFLKRPTLKW-TD-RKC-----DPDFCP
Domains //.....
```

```
OGR07205.1 -----
PDWI01005922_5 FCLLDR-FGGEKSEEGRKN---DYDVHFSNLPFYFGSSPKVWSGPE--EIGRLRLNRDLRLTKAQDFRIYEVDQVR--DFFGTITLAGDLPRKVDVEFLLRRLGLFVSTLCGACCEIKVVDLKKKQNNK-----
KHE91659.1 FCLLGR-FDNAGKVHERNK-----DYDIHFSNFD--LDH-KQE-KNDLRLVDIASGRILNRVDFDTGKAKDYFRTWEADYTYGTYTRITLRN--EHAK---KLLASLGFVDKLCGALCRIEVK-----
KKO18793.1 FCLLGR-RLHGGKEDVNEAPGSCRKPVGFGNLS--LPF-QPT-KRQIQ--DVCKERVLNRVDFRTGKAQDYFRVFEIDHEDWGVYTGEITE--PRVQ---EMLEASLKFVDLCGALCRIEVG--SADETK-----
WP_007220849.1 LCMLLGR-FDKAGKRH-RDNKYDKHYDIHFONLN--LIT-DKK-FSHPD--DIASERILNRVDTYTGKAHDYFKVWEVDQWQWQTGTITMHDDCSKA---GLLLASLCFVDKCGALCRIEVTGNNSQDNKEYAHPDTGITSLN
OQY58162.1 LELLGPAVGKEGEAGIN---SY-VNFGNLS--FPG-DTG-YSNAR--EIAVRRVVNRVDYASGKAHDFRIFEVDHIAFCFHEIAFGENVSSQAR--NLLQDSLRFTDRLCGALCVIRYDGD-----
Domains .....
```

```
OGR07205.1 -----CTED-----KATLWG-KESASK-----SVKTILESIQCPTVEQ---K
PDWI01005922_5 -----EDSILPVSEVFFLEPEVLAKMCQDVFPSG-----KLRMLADVILREEGPDNLT---LPMGSQLGGRL---PHLWD-VLPVSKDRETQLRSCLEKIAAQCKSEQT---Q
KHE91659.1 -----KSESPLPSDTKQSYTK--DDTVELSEDHND--ELRKQAEVIVEAFKQNDKLE-----KIRLADAIRTLRLHEGVIEKDELPDGKEERDK-----GHLWD-IKVQGT-----ALRTKLELWQSNKDI---G
KKO18793.1 -----RTTSKEGCPASTTTRDCSS---ENDDTSPEDPVRE--DLKIAHVIANAFQNSGNRE-----KVHALADAIRAMRLESSIINT--LPKGKSEKTTEQIEVNKHYLWEIPVNDT-----SVRHILEQWRWQSKKDDPE
WP_007220849.1 LKYQNSTIHQDAVLSGSAHDNDEPPVHDNDSLDNDTIT--LLSMKAKEIVGAFRESGKIE-----KARTLADVIRAMRLQKPIWEK--LPKGIND-----KHHLWD-REVNGK-----KLRNILELWRLMNKRN---A
OQY58162.1 -----IPKCGTAP-----LPETESIQN--AEETARAIVRVFHGRRKDPEQAIDKAEQILLSAVRLGRDKKVSA---LPLNHEGKE-----DHYLWD-KKAGGE-----TIRTILKAAAEKEAVAN---Q
Domains .....
```

```
OGR07205.1 RSFFANLADQLVSRAGEQ--GAKSVRSQLIIGRKENYAK--PSAQEP---TRHHYRQPSNA---SAFLATGWLIAETPFFIGSGTE-----GQKQTDDQAESLHRLTRDGHGRFRIPFTTIRGVMDKELRDIL-QA
PDWI01005922_5 FRLFCQKLGSSLFRINKGVLAPNSKISPEPCLDPSKTIR---TKGPVP---GKQKHRFSLLPP---FEWIITGTLKAQTPFFIPDEQ-----GSHDHTSRKILLTRDFYRLPRSLRGIIRRDLHEATDKG
KHE91659.1 WRKFTMLGSNLYLIYK--ETGGVSTRFRILGDTEYSK--AHDSEG---SDLFIPVTPEGIETKEWIVGRLKAATPFFVGQPSDSIPGKEK-----KSEDSLVNEHTSFNILLDKENRYRIPRSALRGALRDLRIAF-GS
KKO18793.1 WNKFCDLGECLYKEYK--LTSGIQSRARVMGETEYGALGMPDKVIP---LLKSDKT-----KEWILVGSLKAETPFFGLET-----EQTEVEHTSLRLVMDKKGRFRIPRSVLRGALRDMRIAF-DS
WP_007220849.1 WRQFCIELSEELYKEAK--AHGLEPARRIMGDAEF-----SDKSVP---DTVSHSIGISVE---KETIMGTLKAETPFFGIES-----KEKKQT.....LMLLDGQNHYRIPRSALRGILRDIRSVL-GT
Domains .....
```

```
OGR07205.1 GCAGRSLRAEFCCVCHLMRRIQVR.....AIAADILPDLRMRTRIDPSHGTVAH--LSLEMAPQLKLPFLKLKGV-ETIDPDKELLINDWSA-----GQCFLGLGWGTGKGRFRL-DDLW---HRLELDNADYTPLLQDRFFA
PDWI01005922_5 GCRVELAPDVECCVCRLLGRMLLA.....TTSTTKVAPDMRHVGVDRSCGIVRDGALFDTEYGIEGVCFLEIRYRGN-KDL--EGPIRQLLSWQQ-----GLLFLGDFGIGKGRFRL-ENMKI---HRWDLRDESARADYYQKCGLR
KHE91659.1 GCNVSLGGQILCNCKVCHEMRRITLK.....SVSDFSEPPEIRYRIAKNPGTATVEDGSLFDIEVGELTPFFVLRYRG--HKF--PEQLSSVIRYENDGKNGMAWLGLDSTGKGRFAL-KDIKI---FEWDL--NQKINEYIKERGMR
KKO18793.1 GCDVKLGSPLPCDCSVCVMRSITIK.....SRSEAGLPQIRHRIRLNPSGTVDEGALFDIEVAPEGVIPFVMYRG--EEF--PPALLSVIRYWQD-----GKAWLGGEGATGKGRFALAKDLKM---YEWKL--EDKSLHAIDITYGHR
WP_007220849.1 GCIVELGRMIPCDCKVCAIMRKITVM.....SRSENIELPDIRYRIRLNPTATVDEGALFDMEIGPEGITPFFVFRYRGE-DAL--PRELWSVIRYWMD-----GMAWLGGSGSTGKGRFAL-IDIKV---FEWDLCNEEGLKAICSRGLR
OQY58162.1 GCNAEVGR-FCLCVCRIMKNITVM.....TRSTDTLPEVRRIRLNPTGSVQEKALFNEMMEMGTEGIEFPVLSYRGK-KTL--PKELRNVLNWTE-----GKAFLGGAASTGKSIFQL-SDIHA---FSSDLSDETARESYLSNHWR
Domains .....
```

OGR07205.1 GET-----ISDLRQG-----LQSINIQPERIP-----AQTPSRNMPLY-----CRVDCILEFKSPVLSGDPVAALFESDAPVNVAYKKPVVQYDETGLRLTTDPGPVEMLT  
PDWI01005922\_5 RGV-----GDDTAIN-----LEKDLSLNL-----PESGYPW-----KKHAWKLSFQVPLLTADPIMAQTRHEE--SVYFQKRIFTSDGRVVLV-----  
KHE91659.1 GKE-----KELLEMGES-----SLPDGLIPYKFFEEBECLEFPYKENLKPQW-----SEVQYTIIEVGSPLLTADTISALTEPGNR--AIAYKKRVY--NDGNNAIEPEPR-----F  
KKO18793.1 GNEHAIGTQCGIDGFRSG-----SLSDLLSDISKESFRDPLASYHNYLDKRW-----IKVGYQITIGAPLLSADPIGALLDPNNVVAIVFEKMKL--DGDQVKYLP-----  
WP\_007220849.1 GIE-----KEVLENKTIATIEITNLFKTEEVKFFESYSKHIKQLCHECTINQISF--LWGLRSYIYELGLPW-----TEVKYIETIASPLSSDTISALLNKDNI--CIAEKRWK--ENGGIKFVP-----  
OQY58162.1 GIM-----ENSIVHE-----SPLEGGAGGCSF-----GLSDLPLKLGWHAEDLKLSDIEKYKPFHRQKISVKITLNSPFLNGDPVRLATE-DVAIVSFKKY--TQGGEKIIY-----  
Domains  
OGR07205.1 CLKGEGVRGVVAYLAGKAYDQ-----HDLSHDSNCTFCQAFNGNGKAGSLRFDMPVPQFESDQAGNFSWSPHTPHA-----MRSDRVALDVF--GGAMPEAKFDDRPLAASPGKPL  
PDWI01005922\_5 ALRGEGLRGLLRTAVSRAYGIS-----LINDEHEDDCPLCKIFGNEHHAGMLRFDMPVPV--G--TWND-----KKIDHVSCSRFDASVNVK--FDDRSLVGSPDSPL  
KHE91659.1 AVKSETHRGI FRTAVGRRRTGD-----LGKEDHEDCTCMCHIFGNEHESKIRFELELELI-----NGNEFEKLE-----KKIDHVAIDRFTGGALDKAKPDYPLAGSPKKPL  
KKO18793.1 AIKGETIRGIVRTALGKRNNL-----LAKNDHDDCTCSLCAIFGNETETGKIRFELELVY--D--KDIA-----KKIDHVAIDRFTGGARDQMKPDTLPLIGSPERPL  
WP\_007220849.1 TIKGETIRGIVRMAVGKRSKD-----LGMDDHEDCSCFLCNIIFGNEHEAGKLRFELELVV--E--EKLPEQNSDSNKIPFGVPVQDGDGNREKCVTAVKSYKKLIDHVAIDRFHGGAEKMKFNTLPLAGSFEKPI  
OQY58162.1 AYKSEFRGVVRTALGLRNQGNDIT--GKKNVPLIALTHQDCBMLCRFFGSEYEAGRLYFELELTFE--S--EPEP-----RRFDHVAIDRFTGGAVNQKFFDDRSLVPGKEGFM  
Domains  
OGR07205.1 NFKSTIWIYREDMG-----KEAGKALKR-----ALIDLQNNMAAIGSGGGIGRGWVSRVCFEGDIPDFLED-----FPEPI--TVTEPEQDSQLLKNQAVADETAVSACDT--ADAPHPLAVTLEPGARYF--PR  
PDWI01005922\_5 HFEGTFLHRDFQ-----NDVEIKT-----ALQDFADGLYSIGGKGGIGYGWLFDMEI PRSLRK-----LNSGF--REASSIQDALLDSAKE-----IPLSAPLTFTPVKGAVYN--PY  
KHE91659.1 KIKGRFMIKKGFS-----GDHKLLITT-----ALSDIRDGLYPLGSKGCVGYGWVAGISIDDN-----VPDDE--KEMINKTEMPLEEVESNNGP--INNDVYVPHQSPKQDHK--NKNIYY--PH  
KKO18793.1 RLKGLFWMRRDVS-----PDEKARILL-----AFLEIREGLYPIGKGTGSGYGWVSDLEFDGD-----APEAF--KEMNSKRGKQASFKKISFR-----YPSGAPKHIQNLKATSFYYPH  
WP\_007220849.1 ILKGRFMIKKDIV-----KDYKKKIED-----AMVDIRDGLYPIGKGTGIGYGWVDTLTLNLPQSG-----FQIPVKKDISPEPGTYSTY-----PSSHSTP--SLNKGHIYY--PH  
OQY58162.1 TLIGCFWMRKDKE--LSRNEIEELGK-----AFADIRDGLYPLGAKGSMGYQVAELSLVDDSDDENNPAKLLAESM--KNASPSLGTPTSL-----KKKDAGLSLRFDENADYY--PY  
Domains  
OGR07205.1 VLIIPR-----APTVKRDECVTGQ----RYHTG----RLSGKIFCELNTLGPLFVPTDYSAGVVPVPSISDEQLAECQLQAVFENTSCKFNEFFATYPEETVTKLKDLLCAADDKWI LAVKDI TADLRQEIGEDTFQRIIRKAG--  
PDWI01005922\_5 YYL--PFP-----AEKPERCLVPPSH----ARLQSD----RYTGCLTCELETVSPLLPDTRC-----EKDGN--  
KHE91659.1 YFLDS-----GSKVYREKDIITH--EFTTEE-----LLSGKINCKLETLP LIIPDTS-----ENGLKLGKNGKPG--  
KKO18793.1 YFLEP-----GSKVIREQKMI GHEQYYESYPSGASGEKLLSGRIICSMTHHTPLIVPDTGV-----IKDPENK--  
WP\_007220849.1 YFLAP-----ANTVHREQEMIGH--EQFHKEQKGE LLVSGKIVCTLKTVTPLIIPDTEN-----EDAFGLQNTYSG--  
OQY58162.1 YFLEP-----EKSVHRDPVPPGHE--EAFRGG--LLTGRITCRLTVRTPPLIVPNTET-----DDAFNMEKAGKGGK  
Domains  
OGR07205.1 ---HKTQRFHQINDEIGLPGASLRGMVLSNYQILTNSCYRNLKATEEITRRMPADEA-----KYRKAGRVT---VSGDGAQKKYS-----IQEM  
PDWI01005922\_5 ---YKEYPSFRLNNTPMIPGACGLRAAVSQVYEVLTNSCIRIMDQCOTLSWRMSTSEHK-----DYQ--PKGIT-----DNGRK-----IQPM  
KHE91659.1 ---HKNYKFFNINGELMIPGSELRGLRTHFEALTKSCFAIFGEDSTLSWRMNADEKDYKIDSNIRKMSQRNPKYRIPDELQKELRNSGNGLFNRLYTSERRFWSVDVSNKFENSIDYKREILRCAGRPNKYKGGIIRQRKDSLMAEEL  
KKO18793.1 ---HATYDFFQMNAIMIPGSEIRGMISAVYEAMTNSCFRI FHEKQYLTRRISPEDKE-----LR---EFI--PGIVR-----IINGDVY-----IEKA  
WP\_007220849.1 ---HKNYQFFHINDEIMVPGSEIRGMISVYEAITNSCFRVYDETKYITRRLSPEKKDESNDKNSQDDASQ---KIR--KGLVK---KTDEGFS-----IIEV  
OQY58162.1 DAYHKSRYRFFTLNRVPMIPGSEIRGMISVFEALSNSCFRI PDEKYRLSWRMDADVKE-----LE---QFK--PGRVA-----DDGKR-----TEEM  
Domains

OGR07205.1 -----EVLRLPIYDNMNT-----DNMPDVAKQATT-----AKRCNNLMN-EAAKTSRVELK-----ARWREGQ-----SKIKYQI DALN-----  
PDWI01005922\_5 GK-----QAIRLPLYDEVLIHVVSTPGDITDLEKLAIVLELTPRWKLEPEE---QKKRRFEKCKNLI---DGRMLQCKELRALENSGFAYWRDKTSLTDSFSLKDAIEQVYPRYSGDYGR-----IKALVUNI TLPWKLLKKEE  
Ga0114919 10000047\_40 T-----NMVVRVFNVCPTFFDGLTQCGISCKEETLKWVKNYEWIRLSLGNFWHTHSRKSKEWEKNI PGRILNNQDKQIVLNI---SYQOBERKITLIL-----DKDRVLDYDIT-----  
KHE91659.1 -----KVHRLPLYDN-----FDIPDSAYKANDHCRKSATCSTSS---RGCRERFTCGIKVRDKNRVFLNAANN---NR---QYLNNIK-----KSNHDLYLQYLK-----  
KKO18793.1 E-----REYRPLPLYDDVHI-----TNYEELEYEKYI-----K---KNPGRQKIKNAHR-FNKNIARIAES---NR---NYLCSLD-----RAVRREILSGRK-----  
WP 007220849.1 ERYSMKTKGGTKLVDKVVRLPLYDSE-----AVIASIQFEQYQ-----E---KNEKRNAKIRAAIK-RNEVIAEAVARK---NL---IFLRSLT-----PEELKVKLQGEI-----  
Ga0180009 10000113\_2 -----EEIRLPLYDNP-----DLLPNKIEGEGKGYRFTKIRDS---NGRERLKGQPTGTDSLINI HSAEIR-----EFLKENKHLSS-----GQIPTKWFRCFP-----  
Ga0193932 10482\_5 -----KEYRYPFYDR-----DCSDKKSQEAIFYDEWERSITLTD---DSLEKMAERKGDIS-PKDLKVLKSLK---GK---NYKSTEGLLAFAFKDGGDTGGNLI LGLIFKYAE-RIGDVPYEHPTDTRMMLLSSE  
OQY58162.1 -----KEIRYPFYD-----RTYPERNAQNGYFWDARISLTD---NSMRKMEKDGVP---RNVYIKLNTLK---NK---AYKSEKSLFDLKNKAGGV-GRYKLVKHAVERGGEIPYYSHTPTDCKLLSLVG

Domains

OGR07205.1 --KVDPIIQVISSSKQINPNNGK-----TGW-----  
PDWI01005922\_5 RHKRFDKCRRILKQQPLTKDERKALEESGFANWHGRELLFDRFLKDENSCLIKAEITTDRIASVARNNDYLFEFIKQDFARYKRI IQGLERVPFSLRSLAKSKETSFPQIACLGLRRGRFRLKGYLKI SGNPNANVEISGG---SHSNSG  
Ga0114919 10000047\_40 --PKQLGGKEEIRLWLRISQYQAFKFKKPDNNGGW-----  
KHE91659.1 -----GEKKIRFNKSVITGSE-----SPIDV-----  
KKO18793.1 -----KVNFRLLVKVNDNK-----NPDKE-----  
WP 007220849.1 -----LVKFSLSKSGK-----NPNDY-----  
Ga0180009 10000113\_2 --HFGKRGFDGLALLKIKPEWHNK-----NTSGW-----  
Ga0193932 10482\_5 YNRNQ-KSDGKRAYKIKPASKL-----GKGAY-----  
OQY58162.1 PNRQLCRQDTLVQYRI IKHRRGA-----KPEED-----  
FMVAGTSPVENKRICNPACTDKANKSVKGYLKI SGNPKLEYKINISEP-ELDGV  
FMVGTSPENQK-----GKKNNDHGGGYLKI SGNPKIEKENVLTSS-GVPSV

Domains

OGR07205.1 AGHVCCQVNLNPAAWEA-SNFDILINEKCPVER-----QSGPRPTLRCKG-QDSAWYTLTKRSEIFTDK-----KVPDPDINI PPREVKRYNELRDSYKKNTAH---VKPLQTFE-NQES---LANGDLVYFEVN---QFGEASQLTP  
PDWI01005922\_5 -----YSDIWDPLDFSRFLSGKSELRPNTQKT---REYRPSFTCT---VDGQYTNKRCERVFEDS-----AAPAIELPRMVRREGYKGLILDYEQNAKH---IPQGFQTRFSSYRE---LNDGDLVYKTD---SQGRVTDLAP  
Ga0114919 10000047\_40 -----LPETWKD-AQCNSPD-GKIFSGK-----DGNNAVYTMNKYCEMFYFNE-----QKKSRYVPQAVLNQYRQMI EESSMNPQA---PPAIPRSKPI RREKDTALKAGDLVYFRKNENREGEVDAVIP  
KHE91659.1 -----FNSGWDR-FELNILL-DDLETRPSK-----SDYPRRLFT---KDQYENI TKRCERVF EID---KGNKTYGVDDQIKKNYEDILDSYDGIKQD-EVAERFDFTT-RGSK---LKVGDLYVYFHID---GDNKIDSLIP  
KKO18793.1 -----FDAKWDW-WSLNII L-NRMDVRNSQK-----KEYRPRALHFN---HDGKEYTI PKRCERVFRAEAGKRAETEGSYKVPKRVQEQYQNI LRDYESNI GH---IDNTFRTLI-ENCG---LNNGLVYFKPD-NSRKEVVAITP  
WP 007220849.1 -----FNDTWDW-EKLNIFH-NAHEKRNLSK-----QGYRPLVKFI---KDRVEYTI PKRCERIFIP-----VKNTIEYKVVSSKVKQYKDVLSDYKKNFGH---INKIFTTKI-QKRE---LTDGDLVYFIPNEGADKTVQAIMF  
Ga0180009 10000113\_2 -----KDEQINI-IHNEVTL-EKPVNSKLGQV---LRKRAI PKYVTY---KNGYEYTMTKRERIFIP L-----QKPTKHI VSRNVRKFLQDCEYKQNAEK---IPKVFTRMFKNYK---LNDGDLIYFRQE---LGEVVEIIP  
Ga0193932 10482\_5 -----EDRNCQI-IHNRIYL-RKIFVANAKRKE---RDRLVGEFACYDPEKVVYTMTKRERIFIKD-----RGRTLPTI THEASELFEILVQYRENAKRQDTEVVFQTL LDPDNGR---LNPGLVYFREE---KGTVEIIP  
OQY58162.1 -----ENMGAVV-HNCPRL-VEVTVRCGRKQEEBCKRRLVPEYVADPEKVVYTMTKRERIFLEK-----SRRIIPPTNDAVDKFEILVKEYYRRAEQDTPAFAQTILPENGT---VNPGLLYFREE---KGAAEIVP

Domains

OGR07205.1 VSISRTTDLFPPIGRPLQGHKDLFPCTAMCLSECKNCVPAS---FCEFHRSRHEKLPDPSLACTGTTGNRGRIFKFEAWL---SGLPKWHSVSQDNVGRGLGVTMPRLERSRRTWHLPTK-----DAYLLGQSYYL  
PDWI01005922\_5 VCLSRADDRPLGKRLP---EYRFCAHVCELEEDCPTGKDCPVPI YREGYPARGFCPAQLFGTQMYKGRVRSFSGVVPVNSTRSPQ-----LKYVTLPSQERPRPTWVLPESC-----KGKEKDVPRGRKFYL  
Ga0114919 10000047\_40 VRIYRESHRKPLGKRFDPGLHDLRCPCTFECLDDODCK-PDRCNELKEFFNPHPKGLCPACRLFGTTSYKRSVSGFARLCESDKKAHWYVEEADAEQ-GKPLTLPLLERPRPTWSPMDK-----DAKIPGRKFYV  
KHE91659.1 VRI SRK CASKTLGKGLD---KALHCTGL-----SDGLCPCHLFGTDTYKGRVRFKGFYAKY---ENGPEWLTIRGNPN---ERSLTLGVLESRPAFASI PDD-----ESEIPGRKFYL  
KKO18793.1 VKISRKTDRLPQDGRFPHTSSDLRCPVRDCLDTEGDRI MLNSPFKRLFI HPEGLCPACQLFGTNYRGRVRFGFASL---SDGPKWFRKDEGNE---TCHITLPLLERPRPTWSPMDK-----TSTIPGRKFYV  
WP 007220849.1 VPLSRITDSRDLGERLP---HKNLFCVHEVNEGLLSGILDSL---DKLLS IHPEGLCPCHLFGTNYRGRVRFGFANL---MKNPKWLTRENGC---GGYVTLPLLERPRTWSPMDK-----KCDVPRGRKFYI  
Ga0180009 10000113\_2 VRI SRVAVDEVLGEKRV---NDDFRCPVREILNRETEKKTISAG-FKEVFHHPKGLCPACALIFGTTTYKGRVRFGFAYL---KNNETKLVEN---GAYITLPLLERPRPTWAMPTK-----DSKVPGRKFYI  
Ga0193932 10482\_5 VRI SRKIDDSPIGKRLR---EDLRPCHEGEMIEGDDLSQLSEYP-EKLFTRNTEGLCPACRLFGTGAYKGRIRLRFGFAKL---ENDPKWLMKNSDGP SHGGPLTLPLLERPRPTWSPMDTTLNRLKKGDKGQPKKQKGGKQVPRGRKFYV  
OQY58162.1 VRI SRKVDDRHIGKRRI---PELRPCHEGEMIEDGGLSKLDAYPAEKKLLTRHPKGLCPACRVFGTGSYKSRVRFGFAL---KGTPKWLKEDPAEP SQGKGLTLPLLERPRPTWAVLHN-----DKNSEIPGRKFYV

Domains

OGR07205.1 NH-----PVPAILPSD---QVPSENNQTVEPLGPKNIFSFQLAFDNLSTIEELGLLLYSLELESMAHRLGRGRALGMGSQVSVKDIQIRDNKSLFSSNISKKSE-----WIQCCKDEFAQEAWFGE-----SWDN  
PDWI01005922\_5 RH-----DGWREMWGDDDKDRSP---SSEECQDIIEGIPGPEKHFHFRVAFENLKDNEGLRLLYSLELDAGMNHHLGRGKAFGQVQIRVTKLERRLDPGQWR---SEKICT---DLPVTSSELV-----ISS  
Ga0114919 10000047\_40 HHPHSVDSISIRDMQFDELSKDNQKIRFNKNRNTVEPLDRGNEFTFDIRFNM LKEWELGLLLYSLELQLETGLAKHLMGKAGQGSVEIDVEKVEIRNGPGDWKSKTSHKITE-----WITKGDKLE---KWFKTD-----DMNN  
KHE91659.1 HH-----NGWRIIR---QKQLEIRE---TVQPERNVTTEVMDKGNVFSFVDRFENLRWELGLLLSQSLDPCKNIAHLKKGKPKYGGSVKIKIDLSHTFKINSNNDKIKRVPQSD-IRE-YINKYQKLI---EWSGNNSIQKGNVLPQWVH  
KKO18793.1 HH-----MGYETV-----KKNQRTLVKTENNRTVKALDKENEFTFEVFFENLRWELGLLLHCLLEPEMGMHKLGMGKPLGFGSVKIRIDKLQKCVVNVKDCVWLWEPEDKIQH-YIAKGLGKLT---TWFGK-----EWRD  
WP 007220849.1 HH-----NGWQEV-----LRNNDITPTKENNRTVEPLAADRNFTFDVI FENLRWELGLLLYCYLELEPGMGHKLGMGKPMGFGSVKIAIERLQFTTVHQ---DGINWKPSENEIGV-YVQGREKLV---EWFTPSAPHKNM---EWNG  
Ga0180009 10000113\_2 HH-----QGWKNI---VEDSKNES---TEKNENNRSVQAI DRNQVLFVFEVRFENLRWELGLLLYSLELEPKLAHKLGMGKPLGFGSVKIKVENVTSRQKDVNDNTLPEAVEKELKEIWKETEPDPT  
Ga0193932 10482\_5 HH-----DGWKEINCGCHPTTKEN---IVQNNRNTVEPLDRGNTFSFEICFENLEPYELGLLLYLELEKGLAKHLMGKAPMGFGSVIDIEVENVSLRDTSGQWKDAN-EQISE-----WTDKGDK DAG---KWFKT-----DWEA  
OQY58162.1 HH-----NGWKGISSEGIHPISGEN---IEPDENNRTVEPLDRGNRFVFLS FENLEPRELGLLHLSLQLEKGLAKHLMGKAPMGFGSVIDESVSRVVKHRSGEWDYKDGTEVDG---WIEEGRGVA-----A

Domains

OGR07205.1 IDHIQRLRQALTIP---VKGDVGCIRYPKLEAEG-----GMPDYIKLRK-R-----LTPLCDREPEVRYRINPVQLARMLLPVFWPHGACALLNEQVMIEAKRRLTELXDRANWPC-----  
PDWI01005922\_5 LKKVEERRKLLRLV---MTPYKGLTACYPLEREN-----GRPGYTDLKLMLAT-----YDPIRELVVQIGSNQ-----PLRPWYEPGKSFKPSGNDCTGRGSSVSKSLISEPKVVPAPAFCEGVVWFNSVKGFGFIETKE  
Ga0114919 10000047\_40 VDHIAIDLKFLYFL---DPQEKPKVRYVPLSRD DDKKD---HFPGYVLDKRRKPSKKNPNYVVPEDKRRALLTR-----PWEWYVMPKSM-----GTWKVNEKKNYGLIRDN  
KHE91659.1 IPHIDKYLKLVVFPFLNDSKLEPDRVYVPLNEESKGYIEGSDYTYKLGDK-D-----NLPYKTRVGLTIT-----PWSPNFPQVIAEHHEQEVNVTVGSRPSVTDK-----TERD  
KKO18793.1 LEHIQGLRSLQRLL-----  
WP 007220849.1 VKHIKDLRSLLSIP-----GDKPTVYKPTLNKDAEGAI---SDYTYERLSD-TK-----LLPHDKRVEYLRIT-----PWSPNWAFVKEAEYSPSEKSEDEKGRETI RTKPKSLPS---VKSIGKWKVDEGKGFGLIMDD  
Ga0180009 10000113\_2 --RSLEGLYKALHYE---SKNGIQVRYFKPLEKKEKKDDPG-EKPGYLELAD-G-----PFSTENRKEKLLKE-----IWNGNA-----  
Ga0193932 10482\_5 AEHIKNLKLLFLP---GEEQNPRVYIPALKQKIDPNS---RLPGVEELKK-----NLMMEKREKMLTIT-----PWAPWHI IKK-----  
OQY58162.1 KKGANDLRKLLYLP---GEKQNPVHYVPTLKEKKGDP---PGYEDLKS-F-----REKLLNRKMLTIT-----LWEPWHK-----

Domains













### **Supplementary Figure 3**

#### **Selected gene neighbourhoods of subtype III-F CRISPR-Cas systems**

Designations and abbreviations are the same as in Supplementary Figure 1. See also the system description in the text.

Pseudothermotoga lettingae TMO\_NC\_009828 98639..102659

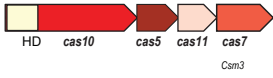

Thermotoga sp. KOL6 NZ\_LNDE01000001 206594..202369

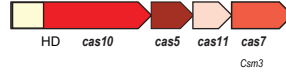

Ferroglobus placidus DSM 10642 CP001899 252831..249216

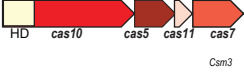

Anoxybacter fermentans NZ\_CP016379 2618433..2614060

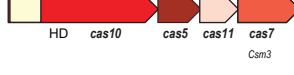

Nitrospinae bacterium RIFCSPLOWO2\_02\_39\_17 MHDL01000098 6188..1191

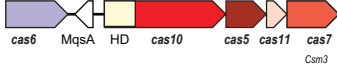

Ferroglobus placidus DSM 10642 NC\_013849 252831..249216

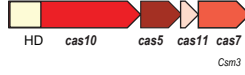

Candidatus Verstraetearchaeota archaeon QMRB01000063 4094..56

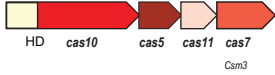

Deltaproteobacteria bacterium QMLH01000866 1..2230

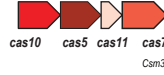

Candidatus Lokiarchaeota archaeon QMYW01000240 5719..1154

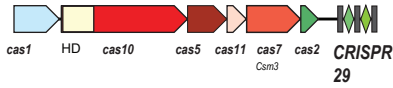

Thermoprotei archaeon QMSH01000092 4208..493

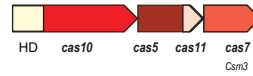

Deltaproteobacteria bacterium CG06\_land\_8\_20\_14\_3\_00\_44\_19 PEVP01000099 8676..576

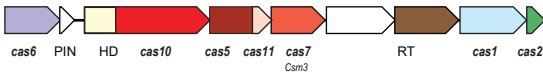

Candidatus Pacearchaeota archaeon QMUZ01000004 16459..2173

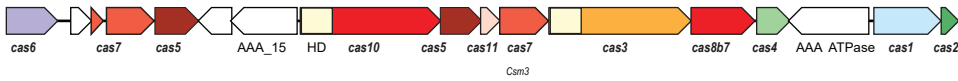

Methanosarcina lacustris Z-7289 NZ\_CP009515 2718430..2697091

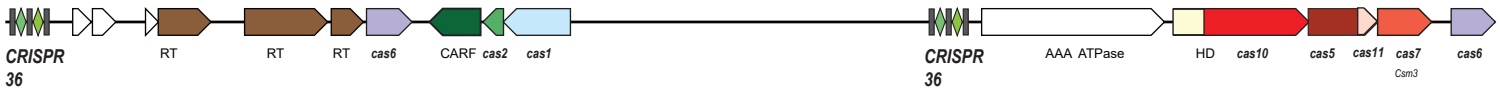

## Supplementary Figure 4

### Selected gene neighbourhoods of subtype IV-C CRISPR-Cas systems

Designations and abbreviations are the same as in t Supplementary Figure 1. See also the system description in the text.

A. Two representatives of the known type IV subtypes.

B. Selected gene neighborhoods of subtype IV-C CRISPR-Cas system. A subtype I-A system that is inserted into the subtype IV-C locus of *Thermococcus sp* is shaded.

Additional abbreviations: PD-DExK, nuclease of the PD-DExK family (also known as RecB or restriction endonuclease family).

**A****Type IV-A**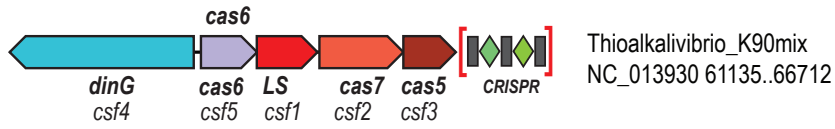**Type IV-B**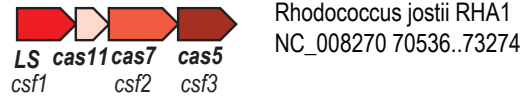**B****Type IV-C**

Thermococcus onnurineus NA1 NC\_011529 302053..296280

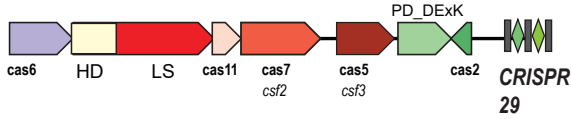

Thermococcus pacificus NZ\_CP015102 830663..836385

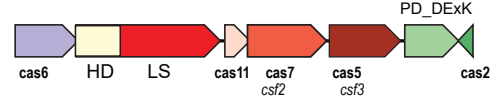

Thermococcus sp. 2319x1 NZ\_CP012200 1116628..1128479

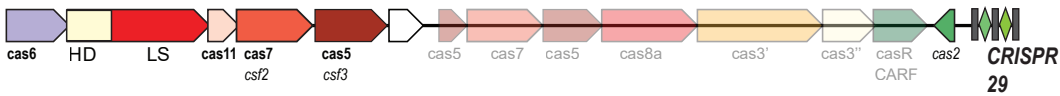

Pyrodictium delaneyi NZ\_NCQP01000002 29461..33678

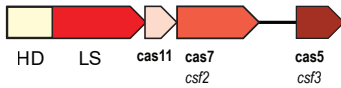

Thermoflexia bacterium RFKE01000401 4661..105

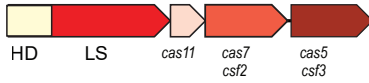

Oscillochloris trichoides DG-6 NZ\_GL501404 258926..254179

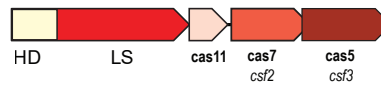

Thermoprotei archaeon QMSI01000139 645..3017

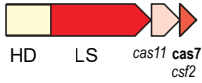

Thermoplasmata archaeon QMSU01000223 275..3207

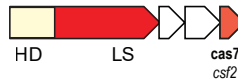

**Supplementary Figure 5 – Derived Class 1 systems lacking CRISPR arrays.**

Designations and abbreviations are the same as in the Supplementary Figure 1.

A. HRAMP (Halobacterial RAMP) system representative. The HRAMP system has been described in detail<sup>22</sup>. XXX, a signature protein of the HRAMP system that it not similar to any other protein family. DEDDy, a nuclease of the DnaQ family of 3'-5' exonucleases; HNH, DNase of the HNH family.

B. Derived CRISPR-Cas systems from metagenomic sequences of Asgard archaea.

# A

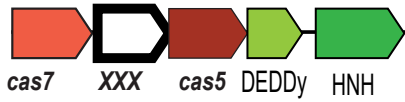

Halogeometricum borinquense DSM 11551 PR3  
NC\_014729.1 1241331..1246082

# B

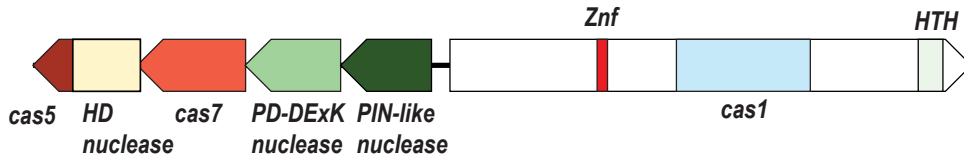

Candidatus Heimdallarchaeota archaeon B3\_Heim  
NJBF01000020 7671..453

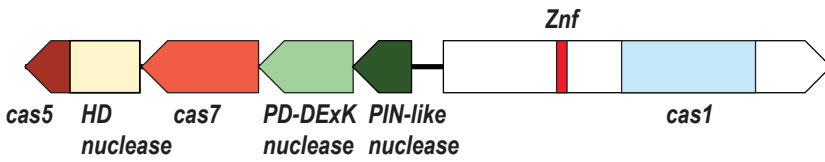

Candidatus Heimdallarchaeota archaeon B3\_Heim  
NJBF01000013 72134..78334

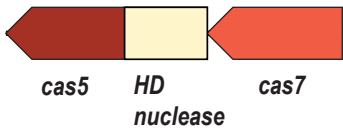

Candidatus Lokiarchaeota archaeon,  
SDMZ01000003 1947..4534

## Supplementary Figure 6

### Deep relationships between Type V effector families.

Profile-profile comparisons were performed and the UPGMA dendrogram was constructed as described in Supplementary Methods. Multiple alignments used for this analysis are available in Supplementary Dataset 2 (see prefix “Type\_V”). The dashed rectangle corresponds to the tree depth  $D$  between 1.5 and 2 ( $D = 2$  roughly corresponds to the pairwise HHsearch similarity score of  $\exp(-2D) \approx 0.02$  relative to the self-score). This region typically reflects sequence relationships that could be reproduced using other methods, such as PSI-BLAST. Generally, if profiles are grouped between 1 and 1.5 distance units they are assigned to one subtype. The proposed renaming scheme for smaller type V effector is shown in green. These relationships were further confirmed using phylogenetic analysis in which the respective type V effectors were combined with TnpB sequences (Supplementary Dataset 4\_trees).



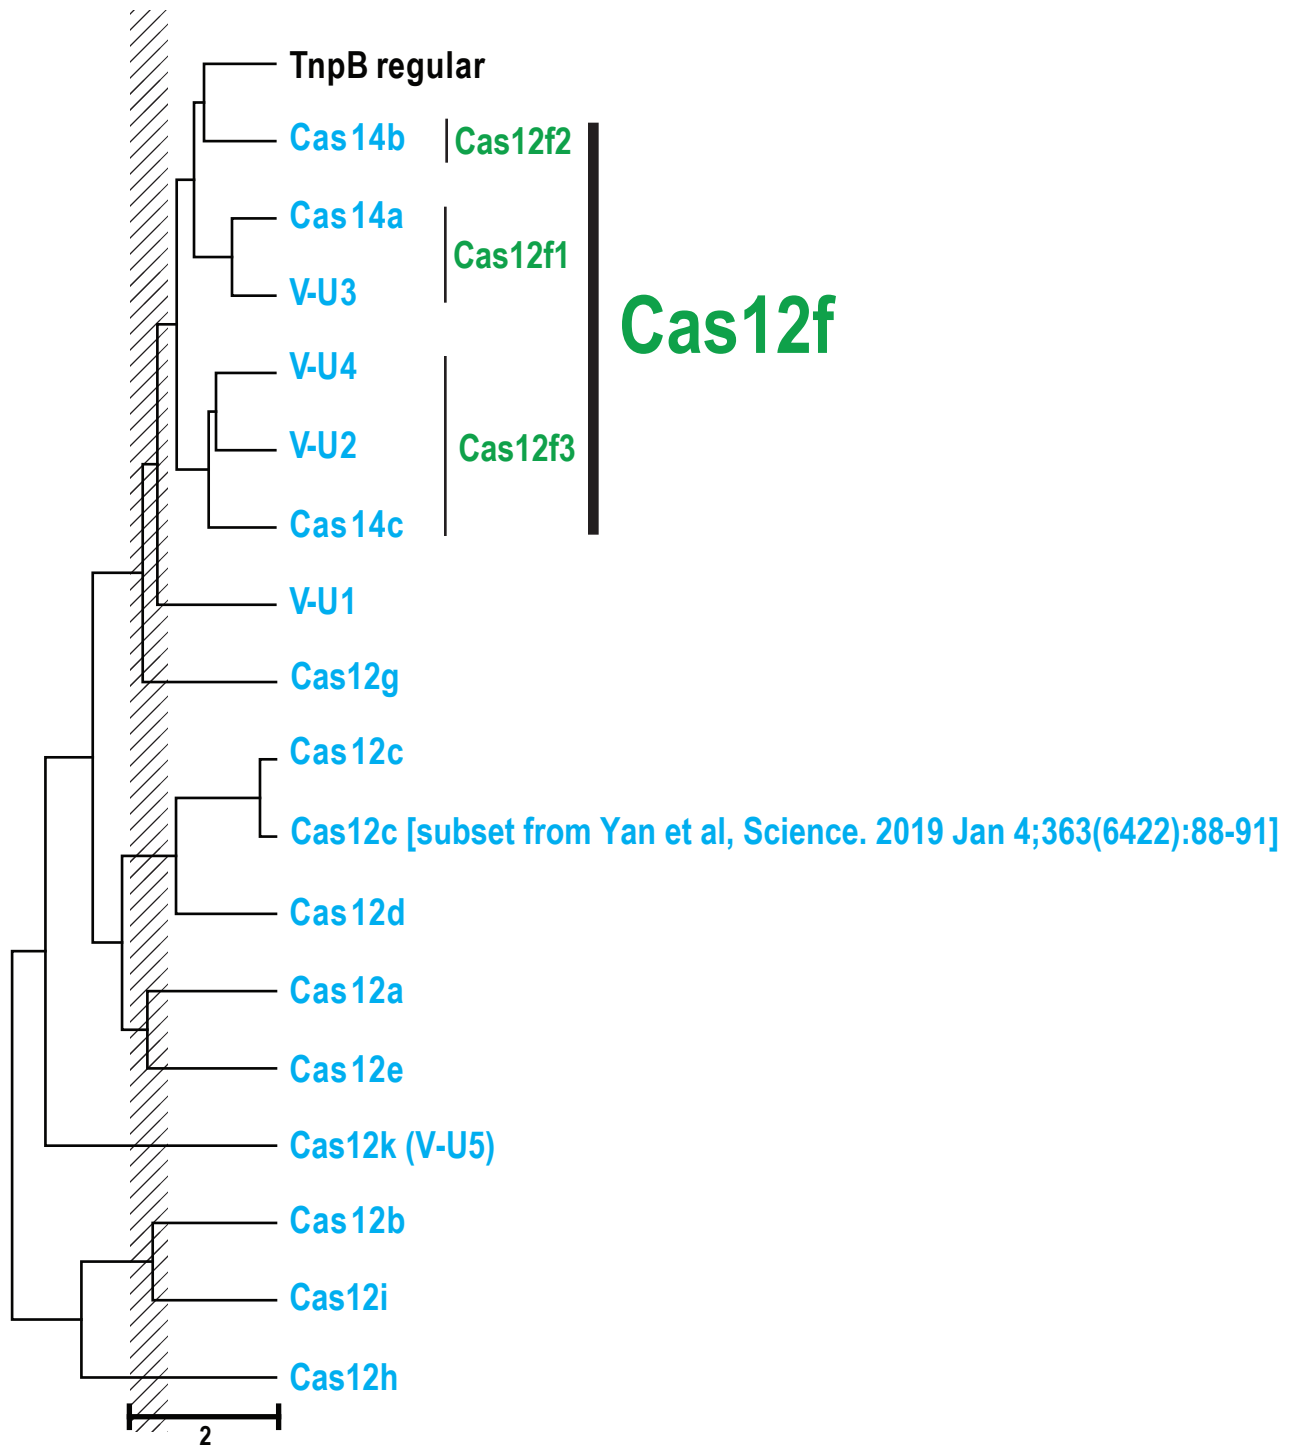

## Supplementary Figure 7

### Deep relationships between Type VI effector families and several most similar HEPN domain families.

To identify the families of HEPN domain-containing proteins with the highest similarity to Cas13, a PSI-BLAST search against the NCBI NR database was performed with the N-terminal domain of Cas13b (WP\_004919755.1, *Riemerella anatipestifer*, 1-195 aa) as the query, with the following parameters: no low complexity filtering, E-value = 0.01, and eukaryotic sequences excluded. After 3 iterations, 5 distinct best scoring HEPN proteins were manually selected. Each of these proteins was used as a query for a PSI-BLAST search, and 8 to 10 diverse sequences from the 100 best hits were selected and aligned using MUSCLE. These families were designated according to the previously published description of the HEPN domain families<sup>23</sup>. These alignments (profiles) were combined with profiles for N- and C-terminal domains of known Cas13 families. Profile-profile comparisons and the UPGMA dendrogram were performed as described in Supplementary Methods. Multiple alignments used for this analysis are available in Supplementary Dataset 2 (see prefix “Type\_VI”). The dashed rectangle corresponds to the tree depth between 1.5 and 2 distance units (see also **Supplementary figure 6**).

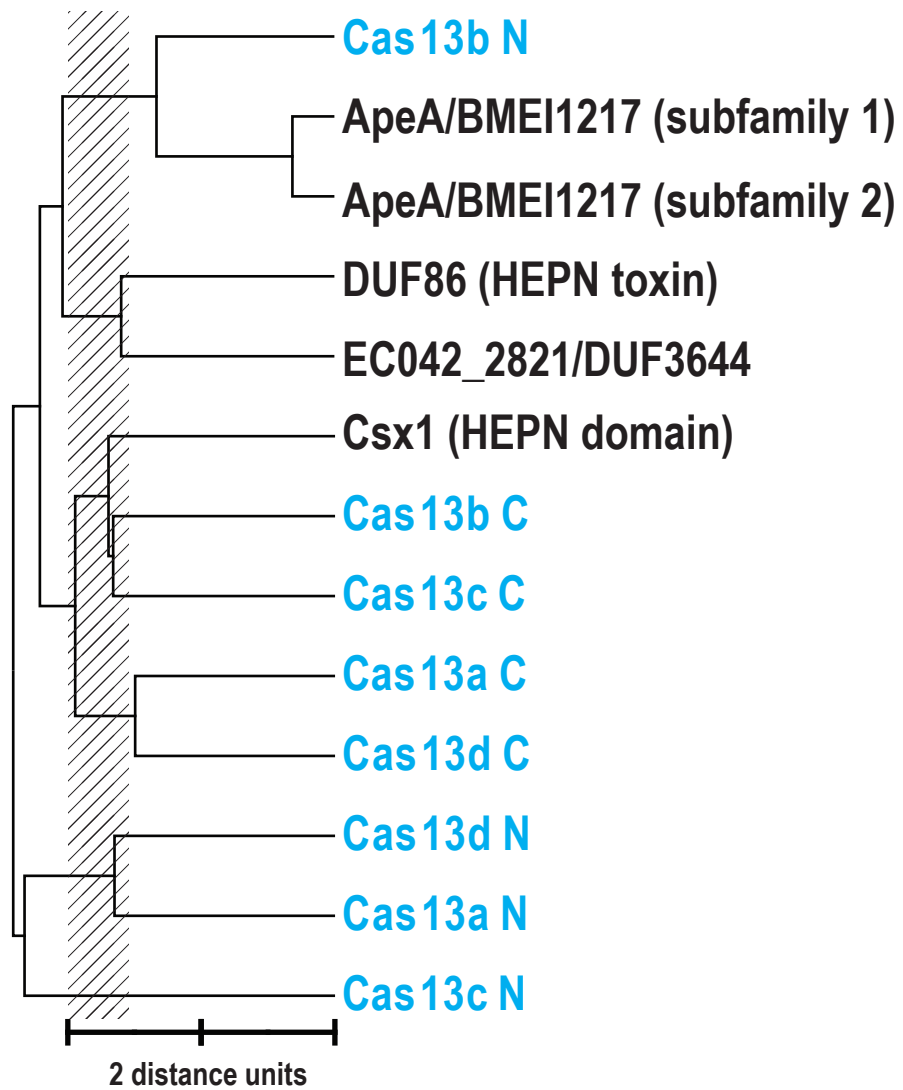

## Supplementary Figure 8.

### Identification and characterization of a distinct variant of type VI in several *Brachyspira* species.

- A. **Selected gene neighbourhoods of the type VI variant from *Brachyspira* species.** Designations are the same as in the Supplementary Figure 1. XXX, an uncharacterized protein with weak but reliable sequence similarity to DUF3800 (see panel B).
- B. **HHpred output for protein XXX encoded in some of the *Brachyspira* type VI loci.** The DUF3800 family belongs to RNase H fold with the highest similarity to RNase H (eg. HHpred search initiated with a DUF3800 representative WP\_041466413.1 identifies profile TIGR00716, ribonuclease HIII, with probability 92%). The predicted catalytic aspartate is shown by the red arrow.
- C. **Alignment of CRISPR miniarrays identified in two *Brachyspira* species.** Identical nucleotide positions are shown in blue for repeats and orange for spacer regions.
- D. **UPGMA dendrogram for the N- and C-HEPN domains of the Cas13 proteins from the *Brachyspira* type VI variant and other type VI systems.** The tree was built as described for Supplementary Figure 7. Two additional *Brachyspira* alignments are available in Supplementary Dataset 2 (see prefix “*Brachyspira*\_Type\_VI”).
- E. **Multiple alignment of N and C- terminal HEPN motifs of the Cas13 proteins from the *Brachyspira* type VI variant.** The catalytic motifs of the HEPN domains are highlighted in red.



## Supplementary Figure 9

### Bipartite network analysis of CRISPR–Cas systems.

- A. Bipartite network architecture: genomes, CRISPR–*cas* loci and *cas* genes. The network contains two categories of nodes, CRISPR–*cas* genomic loci and *cas* genes that are connected by an edge when a given locus includes a particular gene. This approach yields modules that combine loci and genes of which they are comprised. The figure shows a specific example, with five CRISPR–Cas loci that can be split into two modules, one characterized by the presence of *cas9*, i.e. type II (A-Loc1, B-Loc1, and C-Loc1), and the other by the combination of *cas8*, *cas7*, and *cas5*, i.e. type I (A-Loc2 and B-Loc2). For clarity, only some representative *cas* genes are included.
- B. Modules identified in the bipartite networks of CRISPR–*cas* loci and *cas* genes. The vertical axis shows module numbers, and the horizontal axis shows CRISPR–Cas subtypes. The modules are color-coded according to the number of CRISPR–*cas* loci they include (see the color gradient to the right of the maps).

# A

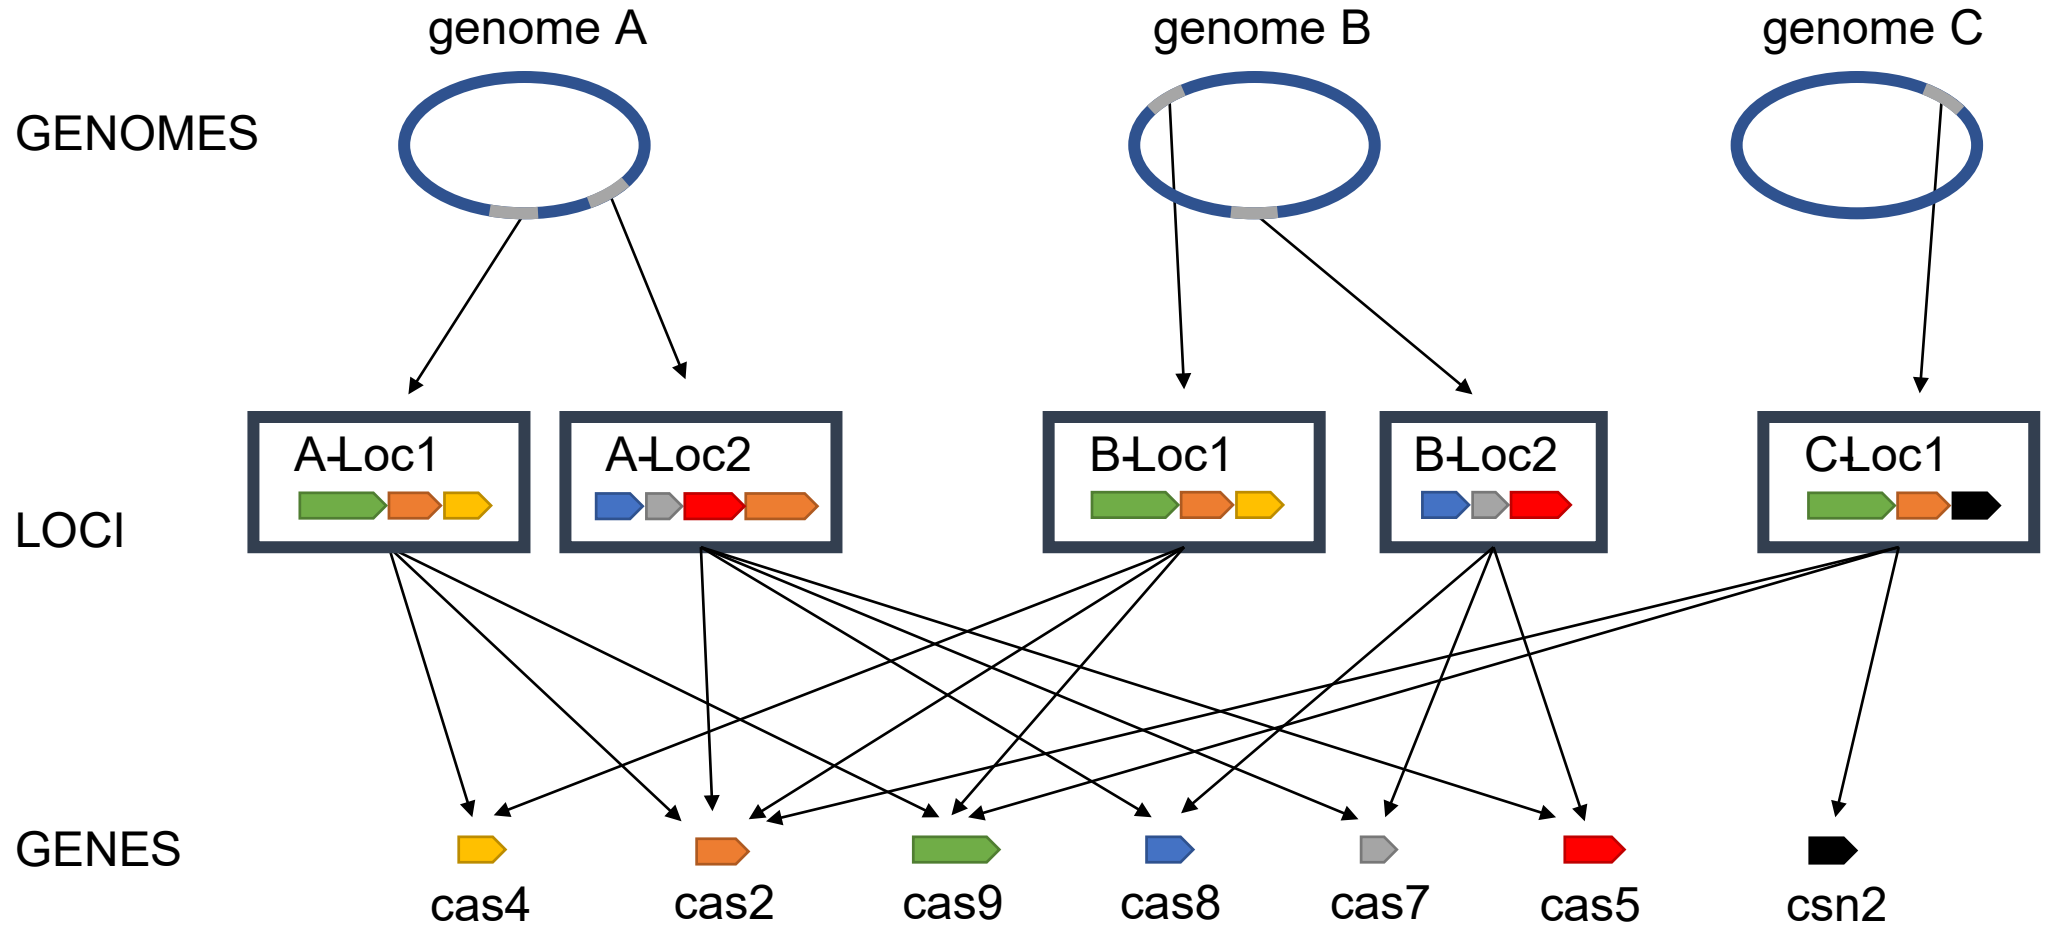

**B**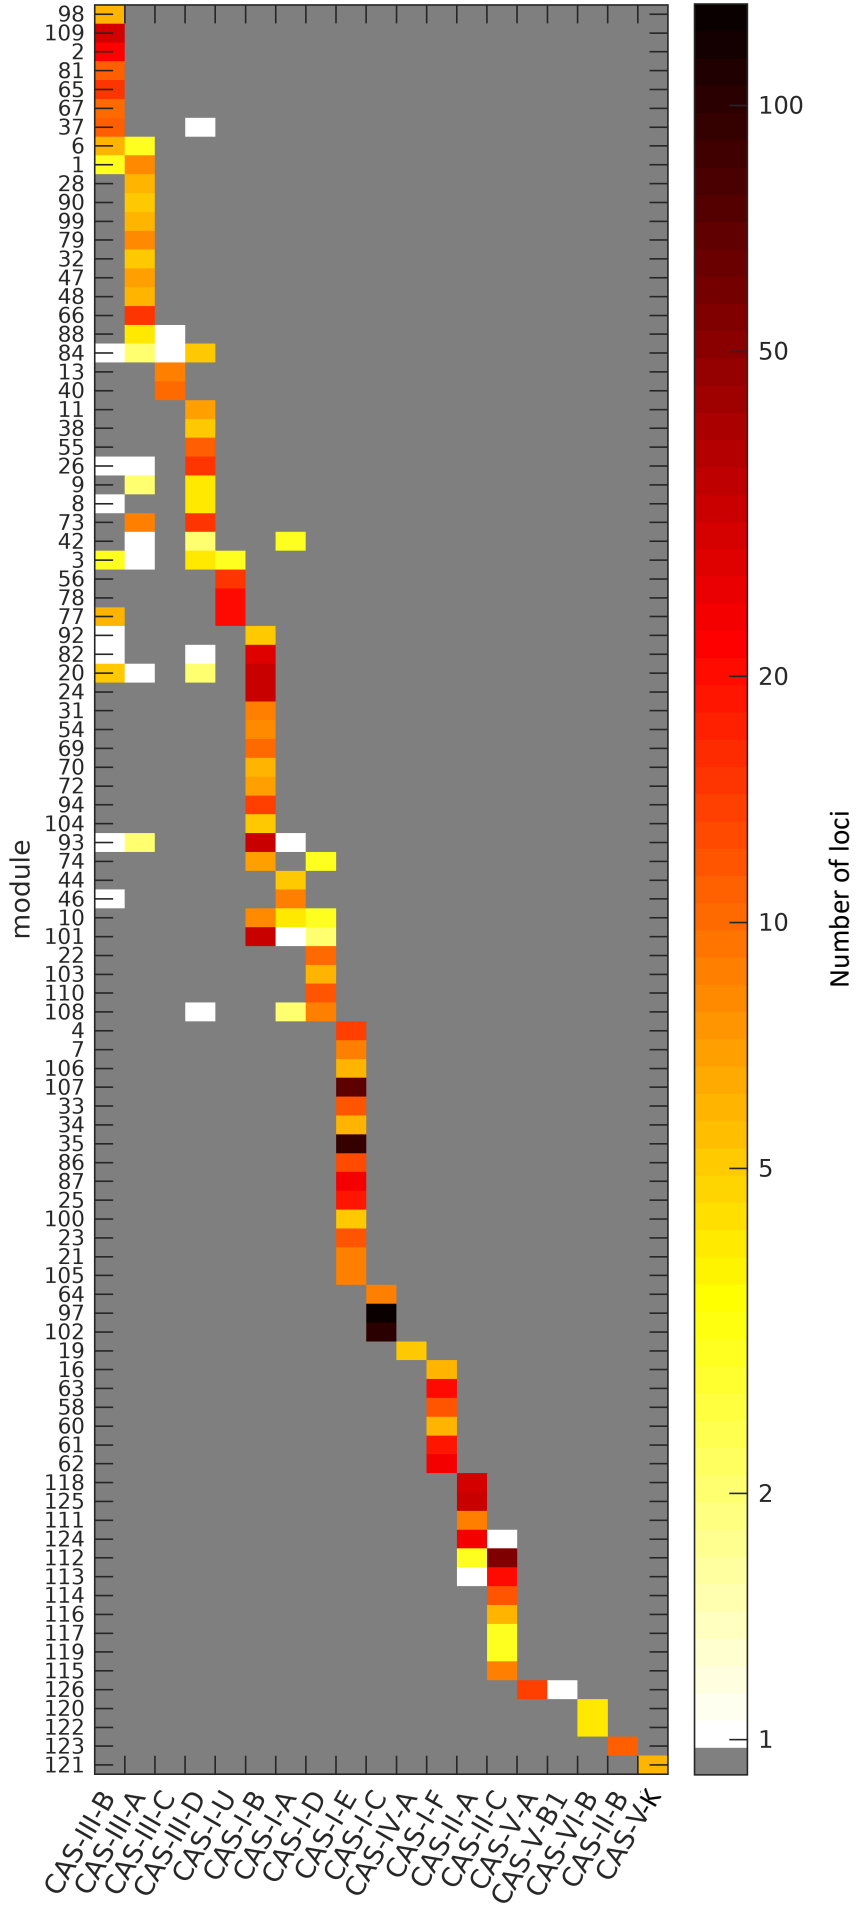



Supplementary Tables

Supplementary Table 1. The core proteins of CRISPR-Cas systems

| Family                                  | Biochemical evidence/ <i>in silico</i> prediction                                                                                                                                                                                                                                                                                                                                              | Examples of available structures and structural features                                                                                         |
|-----------------------------------------|------------------------------------------------------------------------------------------------------------------------------------------------------------------------------------------------------------------------------------------------------------------------------------------------------------------------------------------------------------------------------------------------|--------------------------------------------------------------------------------------------------------------------------------------------------|
| <b>Cas1</b>                             | Metal-dependent deoxyribonuclease <sup>24,25</sup> that functions as the integrase during adaptation <sup>26</sup> ; deletion of Cas1 in <i>E. coli</i> results in increased sensitivity to DNA damage and impaired chromosomal segregation <sup>27</sup> .<br><br>Typically, forms complex with Cas2, but at least one subfamily does not require Cas2 for spacer integration <sup>28</sup> . | PDB: 3GOD, 3LFX, 2YZS<br><br>Unique fold with two domains: N-terminal $\beta$ stranded domain and catalytic C-terminal $\alpha$ -helical domain. |
| <b>Cas2</b>                             | RNase specific to U-rich regions <sup>29</sup> , double-stranded DNase; forms a tight complex with Cas1 and appears to perform a structural role during adaptation. Cas2 proteins are predicted to be active nucleases in many CRISPR-Cas systems but appear to be inactivated in others. The role of the nuclease activity of Cas2 in CRISPR-Cas function (if any) remains unclear.           | PDB: 2IVY, 2I8E, 3EXC, 4P6I<br><br>RRM (ferredoxin) fold.                                                                                        |
| <b>Cas3 (helicase and HD domain)</b>    | Single-stranded DNA nuclease (HD domain) and helicase <sup>30</sup> ; required for interference <sup>31</sup> .                                                                                                                                                                                                                                                                                | PDB: 4QQW, 4QQX, 4QQZ, 4QQY                                                                                                                      |
| <b>Cas3'' (stand alone HD nuclease)</b> | Metal-dependent deoxyribonuclease specific for double-stranded oligonucleotides <sup>32</sup> .                                                                                                                                                                                                                                                                                                | PDB: 3S4L, 3SKD                                                                                                                                  |
| <b>Cas4</b>                             | PD-(DE)xK superfamily nuclease with four conserved cysteines coordinating one [4Fe-4S] or [2Fe-2S] cluster <sup>33-35</sup> ; cleaves ssDNA in the 5' to 3' or both directions <sup>34-36</sup> . A component of the adaptation complexes in many subtypes, assisting in precise protospacer processing and PAM selection <sup>37,38</sup> .                                                   | PDB: 4IC1                                                                                                                                        |

|                                    |                                                                                                                                                                                                                                                                                                                                                                                                                                                                                                                                                           |                                                                                                                                                                                                                                          |
|------------------------------------|-----------------------------------------------------------------------------------------------------------------------------------------------------------------------------------------------------------------------------------------------------------------------------------------------------------------------------------------------------------------------------------------------------------------------------------------------------------------------------------------------------------------------------------------------------------|------------------------------------------------------------------------------------------------------------------------------------------------------------------------------------------------------------------------------------------|
| <b>Cas5</b>                        | Subunit of Cascade complex interacting with large subunit and Cas7 subunit and binding the 5'-handle of crRNA <sup>31,39-44</sup> . In subtype I-C, Cas5 is the ribonuclease that replaces the Cas6 function <sup>45</sup> .                                                                                                                                                                                                                                                                                                                              | PDB: 3KG4; 3VZI; 3VZH<br><br>Two domains of RRM (ferredoxin) fold, the C-terminal domain is deteriorated in many Cas5 proteins of Type I systems.                                                                                        |
| <b>Cas6</b>                        | Metal-independent endoribonuclease that generates crRNAs <sup>31,39,46-50</sup> .                                                                                                                                                                                                                                                                                                                                                                                                                                                                         | PDB: 2XLJ, 1WJ9,3I4H, 4C8Z, 4DZD<br><br>Two domains of RRM (ferredoxin) fold, RAMP superfamily.                                                                                                                                          |
| <b>Cas7</b>                        | Subunit of Cascade complexes binding crRNA <sup>31,41-44</sup> ; often present in Cascade complexes in several copies.                                                                                                                                                                                                                                                                                                                                                                                                                                    | PDB: 3PS0, 4N0L and many others.<br><br>RRM (ferredoxin) fold with subdomains, RAMP superfamily.                                                                                                                                         |
| <b>Cas8abcefu, (large subunit)</b> | Subunit of Class 1 Cascade complex, involved in PAM recognition <sup>31,44,51-53</sup> .                                                                                                                                                                                                                                                                                                                                                                                                                                                                  | PDB: 4AN8                                                                                                                                                                                                                                |
| <b>Cas9</b>                        | Type II effector protein. In Type II CRISPR-Cas systems, Cas9 is essential for pre-crRNA processing and to cleave the target DNA <sup>54,55</sup> , although it requires help of the house-keeping RNase III and a dedicate trans-activating (tracr) RNA encoded in the respective CRISPR- <i>cas</i> locus <sup>56</sup> . Both the RuvC and HNH nuclease domains of Cas9 are involved in the cleavage of the target DNA <sup>57,58</sup> . Additionally, Cas9 contributes to adaptation, in particular, by recognizing the PAM motif <sup>59,60</sup> . | PDB: 4OGC, 4OO8, 4CMP<br><br>Cas9 contains several subdomains, including RuvC and HNH nuclease domains and adopt a bi-lobed general structure <sup>61,62</sup> .                                                                         |
| <b>Cas10 (large subunit)</b>       | Subunit of Cascade (Cmr and Csm) complex <sup>41-43,47</sup> .                                                                                                                                                                                                                                                                                                                                                                                                                                                                                            | PDB: 3UNG, 4DOZ<br><br>Two domains homologous to Palm domain polymerases and cyclases, both belong to RRM (ferredoxin) fold; Zn finger containing domain and C-terminal alpha helical domain <sup>63</sup> ; Fusion: HD nuclease domain. |
| <b>Cas11 (small subunit)</b>       | Small, mostly alpha helical protein, subunit of Class 1 Cascade complexes <sup>31,39,41-43,47,50,64</sup> .                                                                                                                                                                                                                                                                                                                                                                                                                                               | PDB: 2ZCA (Cse2); 2ZOP, 2OEB (Cmr5); 3ZC4 (Csa5);                                                                                                                                                                                        |

|              |                                                                                                                                                                                                                                                                                                                                                                                                                                                                                                                                                |                                                                                                                                                                                                                                                                |
|--------------|------------------------------------------------------------------------------------------------------------------------------------------------------------------------------------------------------------------------------------------------------------------------------------------------------------------------------------------------------------------------------------------------------------------------------------------------------------------------------------------------------------------------------------------------|----------------------------------------------------------------------------------------------------------------------------------------------------------------------------------------------------------------------------------------------------------------|
|              |                                                                                                                                                                                                                                                                                                                                                                                                                                                                                                                                                | Cse2 has two alpha helical bundle-like domains; Cmr5 has a domain matching N-terminal domain of Cse1 and Csa5 has a domain matching C-terminal domain of Cse2.                                                                                                 |
| <b>Cas12</b> | Type V effector protein. In Type V CRISPR-Cas systems, the respective Cas12 variants show highly diverse properties <sup>9,65-69</sup> . Most of the Cas12 proteins contain an active RuvC-like nuclease domain that is typically responsible for the cleavage of both strands of the target DNA. Several Cas12 also contain a subdomain involved in processing of pre-crRNA, but other type V loci, similarly to type II, encode a tracrRNA that is involved in the processing of pre-crRNA along with the house-keeping bacterial RNase III. | PDB: 5NFV and many others (Cas12a); 5WQE and others (Cas12b); 6NY1 (Cas12e);<br><br>Cas12 adopts a bilobed shape and contains several subdomains, including RuvC nuclease domain, and often, an OB-fold domain involved in pre-RNA cleavage <sup>70-72</sup> . |
| <b>Cas13</b> | Type VI effectors. All Cas13 proteins contain two HEPN superfamily RNase domains. Accordingly, type VI systems target exclusively RNA <sup>73-76</sup> . Cas13a and Cas13d are active in processing of pre-crRNA <sup>69,75,77,78</sup> . Once activated by the RNA target recognition, Cas13 becomes a non-specific RNase that appears to be toxic for the cell, inducing dormancy <sup>73,75,79</sup> .                                                                                                                                      | PDB: 5XWP, 5W1I (Cas13a); 6DTD, 6AAY (Cas13b); 6E9E (Cas13d) <sup>80,81</sup> 76,82,83<br><br>Cas13 proteins adopt a bilobed shape and contain two HEPN superfamily RNase domains.                                                                             |

**Supplementary Table 2.**

**The classes, types and subtypes of CRISPR-Cas systems, their signature proteins and key features**

| subtype                                         | Mono-<br>phyletic<br>in Cas1<br>tree | Signature proteins:<br>Strong/weak* (other<br>name)      | Comment                                                                                                                                                                                                                                                                                                                               |
|-------------------------------------------------|--------------------------------------|----------------------------------------------------------|---------------------------------------------------------------------------------------------------------------------------------------------------------------------------------------------------------------------------------------------------------------------------------------------------------------------------------------|
| <b>Class 1: multisubunit effector complexes</b> |                                      |                                                          |                                                                                                                                                                                                                                                                                                                                       |
| <b>Type I: Cascade effector complexes</b>       |                                      |                                                          |                                                                                                                                                                                                                                                                                                                                       |
| <b>I-A</b>                                      | No                                   | Cas8a,<br>Csa5 (small subunit)                           | Cas3 is often split into the helicase Cas3' and HD nuclease Cas3'' and a separate gene for small subunit <i>csa5</i> is often present. Several distinct subfamilies of Cas8a exist.                                                                                                                                                   |
| <b>I-B</b>                                      | No                                   | Cas8b                                                    | I-B systems belong to several distinct clades on the Cas1 tree. Characterized only by gene composition: all loci have <i>cas5</i> , <i>cas7</i> , <i>cas8</i> and <i>cas6</i> genes. Usually the <i>cas3</i> gene is not split. Several distinct subfamilies of Cas8b exist.                                                          |
| <b>I-C</b>                                      | No                                   | Cas8c                                                    | These systems usually do not have a <i>cas6</i> gene. Cas5 is catalytically active and replaces Cas6 function.                                                                                                                                                                                                                        |
| <b>I-D</b>                                      | No                                   | <b>Cas10d (large subunit)</b>                            | The HD domain is associated with the large subunit rather than with Cas3 but lacks the circular permutation of the motifs like the HD domain fused with Cas10 in type III systems.                                                                                                                                                    |
| <b>I-E</b>                                      | Yes                                  | <b>Cse1 (Cas8e), Cse2 (small subunit)</b>                | The <i>cas4</i> gene is not associated with this system.                                                                                                                                                                                                                                                                              |
| <b>I-F1</b>                                     | Yes                                  | <b>Cas8f (Csy1), Cas5f1 (Csy2), Cas7f1 (Csy3), Cas6f</b> | The <i>cas4</i> gene is not associated with this system, <i>cas2</i> is fused to <i>cas3</i> . There is no separate gene for a small subunit, which is either missing or fused to the large subunit.                                                                                                                                  |
| <b>I-F3</b>                                     | N/A                                  | <b>Cas8f/Cas5f (Csy1/Csy2) fusion</b>                    | The <i>cas1-cas2-cas3</i> genes are not present. Usually three genes ( <i>csy1/csy2</i> fusion, <i>csy3</i> and <i>cas6f</i> ) are present in an operon, Effector complex interacts with the transposase subunits (TniQ/TnsD family proteins) and guides the insertion of the Tn7-like transposon to the vicinity of the protospacer. |
| <b>I-F2</b>                                     | Yes                                  | <b>Cas5f2 (PBPRB1993) Cas7f2 (PBPRB1992)</b>             | A derived variant of I-F with two distinct genes of group Cas5 (PBPRB1992) and group Cas7 (PBPRB1993) RAMPs. Large subunit is missing.                                                                                                                                                                                                |
| <b>I-G</b>                                      | No                                   | <b>GSU0054 (Cas5 group RAMP)</b>                         | These systems usually do not have identifiable <i>cas6</i> . Cas5 has several specific insertions or fusions, but is likely to be catalytically active. There are systems with different subfamilies of the large subunit, which are often severely                                                                                   |

|                                                                         |     |                                                                   |                                                                                                                                                                                                                                                                                                                                                                                                                                                                                                                                                                                                       |
|-------------------------------------------------------------------------|-----|-------------------------------------------------------------------|-------------------------------------------------------------------------------------------------------------------------------------------------------------------------------------------------------------------------------------------------------------------------------------------------------------------------------------------------------------------------------------------------------------------------------------------------------------------------------------------------------------------------------------------------------------------------------------------------------|
|                                                                         |     |                                                                   | deteriorated and sometimes even missing. Cas3 contains a C-terminal HD domain.                                                                                                                                                                                                                                                                                                                                                                                                                                                                                                                        |
| <b>Type III: Csm (III-A,D,F,E) and Cmr (III-B,C) effector complexes</b> |     |                                                                   |                                                                                                                                                                                                                                                                                                                                                                                                                                                                                                                                                                                                       |
| <b>III-A</b>                                                            | No  | Csm2<br>(small subunit)                                           | Also known as the Csm module and Cas10 usually has active catalytic motifs, which are involved in synthesis of a signaling molecule, the cyclic oligoadenylate. The III-A loci typically contain several <i>cas7</i> group genes and is often linked to <i>csm6</i> which has CARF and C-terminal HEPN domain. Might be associated with <i>cas1-cas2</i> gene pairs of different origin.                                                                                                                                                                                                              |
| <b>III-B</b>                                                            | No  | Cmr5<br>(small subunit)                                           | Also known as the Cmr (or RAMP) module. Cas10 often has active catalytic motifs, which are involved in synthesis of a signaling molecule, the cyclic oligoadenylate. These systems are usually associated with several Cas7 group RAMPs and are rarely present in a genome as a stand-alone system They are usually not linked to <i>cas1-cas2</i> gene pair. Cmr1 has a duplication of RAMP domains both from the Cas7 group.                                                                                                                                                                        |
| <b>III-C</b>                                                            | No  | Cas10 (MTH326 or Csx11)                                           | Have a small subunit and several Cas5 and Cas7 RAMP protein shared with Type III-B. The large subunit is often inactivated and some Cmr1 family proteins possess only one RAMP domain.                                                                                                                                                                                                                                                                                                                                                                                                                |
| <b>III-D</b>                                                            | No  | Csx10 (Cas5 group RAMP)<br><br>Csx19 (uncharacterized component)  | Have small subunit and several Cas5 and Cas7 RAMP protein shared with Type III-A. The signature gene is <i>csx10</i> which is related to Cas5 group RAMPs. Another specific gene <i>csx19(all1473)</i> is likely to be a component of effector complex but is not similar to any known Cas proteins. The large subunit is often lacking the HD domain, but has active catalytic motifs, which are involved in synthesis of a signaling molecule, the cyclic oligoadenylate. Csx10 could be fused to the small subunit in some systems and Cas7 group RAMPs are often fused and have large insertions. |
| <b>III-E</b>                                                            | N/A | <b>gRAMP (SCABRO_02597)</b>                                       | The gRAMP protein contains three Cas7 group RAMP superfamily domain and a putative small subunit domain. Typically, it is associated with CHAT (caspase) domain containing protein.                                                                                                                                                                                                                                                                                                                                                                                                                   |
| <b>III-F</b>                                                            | Yes | Small subunit (TLET_RS00525),<br><br>Large subunit (TLET_RS00515) | The large subunit, Cas7 and Cas5 group RAMP proteins of the system shows remote but significant similarity with type III system components, whereas the putative small subunit does not. III-F systems contain only one <i>cas7</i> -like gene. Cas10-like subunit has inactivated cyclase/polymerase domain.                                                                                                                                                                                                                                                                                         |
| <b>Type IV: Csf effector complexes and IV-C effector complex</b>        |     |                                                                   |                                                                                                                                                                                                                                                                                                                                                                                                                                                                                                                                                                                                       |
| <b>IV-A</b>                                                             | No  | Large subunit (Csf1)                                              | These systems possess Cas5, Cas7 and a gene for a very reduced large subunit which typically contains Zn finger domain. Occasionally associated with adaptation module, Cas6 and CRISPR array. DinG-like helicase is an ancillary gene that                                                                                                                                                                                                                                                                                                                                                           |

|                                                                 |                     |                                             |                                                                                                                                                                                                                                                                                                                                                                    |
|-----------------------------------------------------------------|---------------------|---------------------------------------------|--------------------------------------------------------------------------------------------------------------------------------------------------------------------------------------------------------------------------------------------------------------------------------------------------------------------------------------------------------------------|
|                                                                 |                     |                                             | is often present in the loci. Mostly found on plasmids or other integrated elements.                                                                                                                                                                                                                                                                               |
| <b>IV-B</b>                                                     | N/A                 | Small subunit (RHA1_ro10070)                | Large subunit, Cas5 and Cas7 are homologous to respective components of subtype IV-A. Additionally a gene for putative small subunit is present in the same loci (eg. RHA1_ro10070). The system is linked to CysH. Most systems are encoded on plasmids or prophages.                                                                                              |
| <b>IV-C</b>                                                     | N/A                 | <b>LS (D6793_05715)</b><br>SS (D6793_05710) | Csf2-like protein (Cas7 group RAMP) and Csf3 (Cas5 group RAMP) resemble respective homologs from subtypes IV-A and IV-B. Putative large and small subunit lack any similarity with respective proteins from any other CRISPR-Cas systems. The putative large subunit contains HD nuclease domain with the same order of conserved motifs as in HD domain of Cas3 . |
| <b>Class 2: Single protein (multidomain) effector complexes</b> |                     |                                             |                                                                                                                                                                                                                                                                                                                                                                    |
| <b>Type II: Cas9 effector protein</b>                           |                     |                                             |                                                                                                                                                                                                                                                                                                                                                                    |
| <b>II-A</b>                                                     | Yes                 | Csn2                                        | Monophyletic group on Cas9 and Cas1 tree. There are four genes in these operons with <i>csn2</i> gene in addition to <i>cas1_2_9</i> . Typically, Csn2 is inactivated ATPase involved in spacer acquisition. There are at least 7 distinct families of Csn2.                                                                                                       |
| <b>II-B</b>                                                     | Yes                 | Cas9 (Csx12 subfamily)                      | Monophyletic group on Cas9 tree with four gene operons containing <i>cas4</i> in addition to <i>cas1_2_9</i> .                                                                                                                                                                                                                                                     |
| <b>II-C</b>                                                     | No                  | N/A                                         | Only three genes are present in the II-C operon - <i>cas1_2_9</i> .                                                                                                                                                                                                                                                                                                |
| <b>Type V: Cas12 effector protein</b>                           |                     |                                             |                                                                                                                                                                                                                                                                                                                                                                    |
| <b>V-A</b>                                                      | Yes                 | Cas12a (Cpf1)                               | A founding member of type V. Cas12a is a large protein which C-terminal region shares a significant similarity with TnpB the ORF encoded by transposable element IS605. Contains RuvC-like nuclease which is sufficient to cleave both DNA strands. Does not require tracrRNA; contains catalytic subdomain for pre-crRNA cleavage.                                |
| <b>V-B</b>                                                      | Yes                 | Cas12b (C2c1)                               | Cas12b2 is much smaller than Cas12b1 (originally characterized Cas12b).                                                                                                                                                                                                                                                                                            |
| <b>V-C</b>                                                      | Yes (C and D clade) | Cas12c (C2c3)                               | Cas12c has been shown to demonstrate strong interference activity in E. coli indicative of dsDNA targeting. The minimal active system consists of a RuvC-containing effector, crRNA, and tracrRNA showing only a short anti-repeat complementary to the crRNA direct repeat. The system is linked to with an adaptation module containing only Cas1.               |
| <b>V-D</b>                                                      | Yes (C and D clade) | Cas12d (CasY)                               | Distant homolog of Cas12c. The system is linked to with an adaptation module containing only Cas1.                                                                                                                                                                                                                                                                 |

|                                        |     |                                                           |                                                                                                                                                                                                                                                                                                                                                                                                                                                                                                                  |
|----------------------------------------|-----|-----------------------------------------------------------|------------------------------------------------------------------------------------------------------------------------------------------------------------------------------------------------------------------------------------------------------------------------------------------------------------------------------------------------------------------------------------------------------------------------------------------------------------------------------------------------------------------|
| <b>V-E</b>                             | Yes | Cas12e (CasX)                                             | A distinct type V effector with limited structural similarity with Cas12a. Contains RuvC-like nuclease domain in the C-terminal region, which is sufficient for dsDNA cleavage. Requires tracrRNA for activity. Adaptation module contains cas4 in addition to cas1_2.                                                                                                                                                                                                                                           |
| <b>V-F</b>                             | N/A | Cas12f<br>(c2c4,c2c8,c2c9,c2c10,<br>Cas14a,Cas14b,Cas14c) | Cas12f proteins contain RuvC-like nuclease domain in the C-terminal region, which displays high similarity with TnpB. Each subfamily forms a distinct branch in the TnpB tree, but the branches are paraphyletic. N-terminal region is unique for each variant. The length of effectors varies from 600 to 800 aa. Cas12f1 shows single-stranded DNA targeting resulting in collateral ssDNA cleavage and require tracrRNA for activity. Some of V-F loci contain adaptation module consisting of Cas1_2_4 genes |
| <b>V-G</b>                             | N/A | Cas12g                                                    | Cas12g proteins contain RuvC-like nuclease domain in the C-terminal region. Cas12g is differentiated from other characterized type V systems by RNA-targeting that triggers collateral cleavage of both ssRNA and ssDNA. This mechanism of interference is abolished by mutation of RuvC catalytic residues. The minimal Cas12g system consists of the compact (~770aa) RuvC-containing effector, crRNA, and a tracrRNA.                                                                                         |
| <b>V-H</b>                             | N/A | Cas12h                                                    | Cas12h proteins contain RuvC-like nuclease domain in the C-terminal region. Compact (~870aa) has been shown to demonstrate strong interference activity in <i>E. coli</i> indicative of dsDNA targeting. Does not require tracrRNA. The type V-H system does not appear to contain an adaptation module.                                                                                                                                                                                                         |
| <b>V-I</b>                             | N/A | Cas12i                                                    | Cas12i proteins contain RuvC-like nuclease domain in the C-terminal region. Showing distant similarity to Cas12b, the Cas12i effectors are differentiated in-part by significant N-terminal truncations. The minimal Cas12i system, consisting of the effector and no tracrRNA, is capable of pre-crRNA maturation, dsDNA cleavage with predominant nicking, and ssDNA collateral cleavage.                                                                                                                      |
| <b>V-K</b>                             | N/A | <b>Cas12k</b>                                             | Cas12k is a component of CRISPR-associated transposase (CAST) interacting with Tn7-like transposase subunits TnsB, TnsC and TniQ. CAST catalyzes RNA-guided DNA transposition by unidirectionally inserting segments of DNA 60-66 bp downstream of the protospacer. Typically Cas12k and cognate CRISPR array are encoded at the left end of the Tn7-like transposon.                                                                                                                                            |
| <b>Type VI: Cas13 effector protein</b> |     |                                                           |                                                                                                                                                                                                                                                                                                                                                                                                                                                                                                                  |
| <b>VI-A</b>                            | no  | Cas13a                                                    | Cas13a is the original CRISPR effector characterized as having RNA target-activated collateral RNA cleavage. The active Cas13a complex consists of the dual HEPN domain-containing                                                                                                                                                                                                                                                                                                                               |

|              |     |                |                                                                                                                                                                                                                                                                                                                                                                                                                                                     |
|--------------|-----|----------------|-----------------------------------------------------------------------------------------------------------------------------------------------------------------------------------------------------------------------------------------------------------------------------------------------------------------------------------------------------------------------------------------------------------------------------------------------------|
|              |     |                | effector, and processes its own pre-crRNA. The system contains no tracrRNA and preferentially target sites with a PFS.                                                                                                                                                                                                                                                                                                                              |
| <b>VI-B1</b> | N/A | Cas13b1, Csx28 | The type VI-B system does not appear to contain an adaptation module. The type VI-B CRISPR systems consist of the dual HEPN domain-containing Cas13b effector. Cas13b1 proteins form a distinct branch in the Cas13b tree and specifically associated with Csx28 accessory protein, which have four predicted transmembrane domains. Csx27 represses Cas13b RNA nuclease activity.                                                                  |
| <b>VI-B2</b> | N/A | Cas13b2, Csx27 | The Cas13b2 effectors has the same features as Cas13b. Cas13b2 proteins form a distinct branch in the Cas13b tree and specifically associated with Csx28 accessory proteins, wich has a predicted transmembrane domain. Csx28 enhances Cas13b RNA nuclease activity.                                                                                                                                                                                |
| <b>VI-C</b>  | N/A | Cas13c         | The type VI-C system does not appear to contain an adaptation module. Cas13c effector family has two HEPN domains, like other Cas13 effector, but otherwise it is not similar to other Cas13 proteins.                                                                                                                                                                                                                                              |
| <b>VI-D</b>  | Yes | Cas13d         | The smallest of the type VI RNA-targeting CRISPR effectors, Cas13d (~928aa) shows strong RNA target-activated collateral RNA cleavage with no requirement for a protospacer-flanking motif (PFS). Cas13d is co-occurs with polyphyletic WYL domain-containing accessory protein families. It has been shown that Cas13d RNA cleavage is positively regulated by WYL1. Type VI-D contains only limited co-occurrence with Cas1/2 adaptation modules. |

Note: \* **Strong/weak** – is the characteristic of the signature protein family with respect to subtype recognition/classification ability using the respective profile. Strong means that it has a relatively high specificity and high selectivity, i.e. is a reliable signature, whereas weak means that search for this family yields either a high fraction of false positives or false negatives, but nevertheless, the family remains the best available signature for a particular subtype.



## References

- 1 Coordinators, N. R. Database resources of the National Center for Biotechnology Information. *Nucleic Acids Res* **44**, D7-19, doi:10.1093/nar/gkv1290 (2016).
- 2 Steinegger, M. & Soding, J. MMseqs2 enables sensitive protein sequence searching for the analysis of massive data sets. *Nat Biotechnol* **35**, 1026-1028, doi:10.1038/nbt.3988 (2017).
- 3 Makarova, K. S., Wolf, Y. I. & Koonin, E. V. Archaeal Clusters of Orthologous Genes (arCOGs): An Update and Application for Analysis of Shared Features between Thermococcales, Methanococcales, and Methanobacteriales. *Life (Basel)* **5**, 818-840, doi:10.3390/life5010818 life5010818 [pii] (2015).
- 4 Bland, C. *et al.* CRISPR recognition tool (CRT): a tool for automatic detection of clustered regularly interspaced palindromic repeats. *BMC Bioinformatics* **8**, 209, doi:1471-2105-8-209 [pii] 10.1186/1471-2105-8-209 (2007).
- 5 Altschul, S. F. *et al.* Gapped BLAST and PSI-BLAST: a new generation of protein database search programs. *Nucleic Acids Res* **25**, 3389-3402 (1997).
- 6 Marchler-Bauer, A. *et al.* CDD: conserved domains and protein three-dimensional structure. *Nucleic Acids Res* **41**, D348-352, doi:10.1093/nar/gks1243 gks1243 [pii] (2013).
- 7 Makarova, K. S. *et al.* An updated evolutionary classification of CRISPR-Cas systems. *Nat Rev Microbiol* **13**, 722-736, doi:10.1038/nrmicro3569 nrmicro3569 [pii] (2015).
- 8 Shmakov, S. A., Makarova, K. S., Wolf, Y. I., Severinov, K. V. & Koonin, E. V. Systematic prediction of genes functionally linked to CRISPR-Cas systems by gene neighborhood analysis. *Proc Natl Acad Sci U S A* **115**, E5307-E5316, doi:10.1073/pnas.1803440115 1803440115 [pii] (2018).
- 9 Shmakov, S. *et al.* Diversity and evolution of class 2 CRISPR-Cas systems. *Nat Rev Microbiol*, doi:10.1038/nrmicro.2016.184 nrmicro.2016.184 [pii] (2017).
- 10 Makarova, K. S. & Koonin, E. V. Annotation and Classification of CRISPR-Cas Systems. *Methods Mol Biol* **1311**, 47-75, doi:10.1007/978-1-4939-2687-9\_4 (2015).
- 11 Edgar, R. C. MUSCLE: multiple sequence alignment with high accuracy and high throughput. *Nucleic Acids Res* **32**, 1792-1797 (2004).
- 12 Soding, J. Protein homology detection by HMM-HMM comparison. *Bioinformatics* **21**, 951-960, doi:bti125 [pii] 10.1093/bioinformatics/bti125 (2005).
- 13 Price, M. N., Dehal, P. S. & Arkin, A. P. FastTree 2--approximately maximum-likelihood trees for large alignments. *PLoS One* **5**, e9490, doi:10.1371/journal.pone.0009490 (2010).
- 14 Katoh, K. & Standley, D. M. MAFFT multiple sequence alignment software version 7: improvements in performance and usability. *Mol Biol Evol* **30**, 772-780, doi:10.1093/molbev/mst010 mst010 [pii] (2013).
- 15 Database resources of the National Center for Biotechnology Information. *Nucleic Acids Res* **46**, D8-D13, doi:10.1093/nar/gkx1095 4621330 [pii] (2018).
- 16 Iranzo, J., Krupovic, M. & Koonin, E. V. The Double-Stranded DNA Virosphere as a Modular Hierarchical Network of Gene Sharing. *MBio* **7**, doi:10.1128/mBio.00978-16 (2016).
- 17 Iranzo, J., Martincorena, I. & Koonin, E. V. Cancer-mutation network and the number and specificity of driver mutations. *Proc Natl Acad Sci U S A* **115**, E6010-E6019, doi:10.1073/pnas.1803155115 (2018).

- 18 Marquitti, F. M. D., Giuimaraes, P. R., Pires, M. M. & Bittencourt, L. F. MODULAR: software for the autonomous computation of modularity in large network sets. *Ecography* **37**, 221-224 (2014).
- 19 Barber, M. J. Modularity and community detection in bipartite networks. *Phys Rev E Stat Nonlin Soft Matter Phys* **76**, 066102, doi:10.1103/PhysRevE.76.066102 (2007).
- 20 Lancichinetti, A. & Fortunato, S. Consensus clustering in complex networks. *Sci Rep* **2**, 336, doi:10.1038/srep00336 (2012).
- 21 Lancichinetti, A., Radicchi, F., Ramasco, J. J. & Fortunato, S. Finding statistically significant communities in networks. *PLoS One* **6**, e18961, doi:10.1371/journal.pone.0018961 (2011).
- 22 Makarova, K. S. *et al.* Predicted highly derived class 1 CRISPR-Cas system in Haloarchaea containing diverged Cas5 and Cas7 homologs but no CRISPR array. *FEMS Microbiol Lett* **366**, doi:10.1093/femsle/fnz079 (2019).
- 23 Anantharaman, V., Makarova, K. S., Burroughs, A. M., Koonin, E. V. & Aravind, L. Comprehensive analysis of the HEPN superfamily: identification of novel roles in intra-genomic conflicts, defense, pathogenesis and RNA processing. *Biol Direct* **8**, 15, doi:10.1186/1745-6150-8-15 1745-6150-8-15 [pii] (2013).
- 24 Han, D., Lehmann, K. & Krauss, G. SSO1450--a CAS1 protein from *Sulfolobus solfataricus* P2 with high affinity for RNA and DNA. *FEBS Lett* **583**, 1928-1932 (2009).
- 25 Wiedenheft, B. *et al.* Structural basis for DNase activity of a conserved protein implicated in CRISPR-mediated genome defense. *Structure* **17**, 904-912 (2009).
- 26 Nunez, J. K., Lee, A. S., Engelman, A. & Doudna, J. A. Integrase-mediated spacer acquisition during CRISPR-Cas adaptive immunity. *Nature*, doi:10.1038/nature14237 nature14237 [pii] (2015).
- 27 Babu, M. *et al.* A dual function of the CRISPR-Cas system in bacterial antiviral immunity and DNA repair. *Mol Microbiol* **79**, 484-502, doi:10.1111/j.1365-2958.2010.07465.x (2011).
- 28 Wright, A. V. *et al.* A Functional Mini-Integrase in a Two-Protein-type V-C CRISPR System. *Mol Cell* **73**, 727-737 e723, doi:10.1016/j.molcel.2018.12.015 (2019).
- 29 Beloglazova, N. *et al.* A novel family of sequence-specific endoribonucleases associated with the clustered regularly interspaced short palindromic repeats. *J Biol Chem* **283**, 20361-20371 (2008).
- 30 Sinkunas, T. *et al.* Cas3 is a single-stranded DNA nuclease and ATP-dependent helicase in the CRISPR/Cas immune system. *EMBO J*, doi:emboj201141 [pii] 10.1038/emboj.2011.41 (2011).
- 31 Brouns, S. J. *et al.* Small CRISPR RNAs guide antiviral defense in prokaryotes. *Science* **321**, 960-964 (2008).
- 32 Han, D. & Krauss, G. Characterization of the endonuclease SSO2001 from *Sulfolobus solfataricus* P2. *FEBS Lett* **583**, 771-776 (2009).
- 33 Makarova, K. S., Grishin, N. V., Shabalina, S. A., Wolf, Y. I. & Koonin, E. V. A putative RNA-interference-based immune system in prokaryotes: computational analysis of the predicted enzymatic machinery, functional analogies with eukaryotic RNAi, and hypothetical mechanisms of action. *Biol Direct* **1**, 7 (2006).
- 34 Lemak, S. *et al.* Toroidal structure and DNA cleavage by the CRISPR-associated [4Fe-4S] cluster containing Cas4 nuclease SSO0001 from *Sulfolobus solfataricus*. *J Am Chem Soc* **135**, 17476-17487, doi:10.1021/ja408729b (2013).
- 35 Lemak, S. *et al.* The CRISPR-associated Cas4 protein Pcal\_0546 from *Pyrobaculum calidifontis* contains a [2Fe-2S] cluster: crystal structure and nuclease activity. *Nucleic Acids Res* **42**, 11144-11155, doi:10.1093/nar/gku797 gku797 [pii] (2014).
- 36 Zhang, J., Kasciukovic, T. & White, M. F. The CRISPR associated protein Cas4 Is a 5' to 3' DNA exonuclease with an iron-sulfur cluster. *PLoS One* **7**, e47232, doi:10.1371/journal.pone.0047232 PONE-D-12-23364 [pii] (2012).

- 37 Shiimori, M., Garrett, S. C., Graveley, B. R. & Terns, M. P. Cas4 Nucleases Define the PAM, Length, and Orientation of DNA Fragments Integrated at CRISPR Loci. *Mol Cell* **70**, 814-824 e816, doi:10.1016/j.molcel.2018.05.002 (2018).
- 38 Lee, H., Dhingra, Y. & Sashital, D. G. The Cas4-Cas1-Cas2 complex mediates precise prespacer processing during CRISPR adaptation. *Elife* **8**, doi:10.7554/eLife.44248 (2019).
- 39 Jore, M. M. *et al.* Structural basis for CRISPR RNA-guided DNA recognition by Cascade. *Nat Struct Mol Biol*, doi:nsmb.2019 [pii] 10.1038/nsmb.2019 (2011).
- 40 Jore, M. M., Brouns, S. J. & van der Oost, J. RNA in Defense: CRISPRs Protect Prokaryotes against Mobile Genetic Elements. *Cold Spring Harb Perspect Biol*, doi:cshperspect.a003657 [pii] 10.1101/cshperspect.a003657 (2011).
- 41 Staals, R. H. *et al.* Structure and activity of the RNA-targeting Type III-B CRISPR-Cas complex of *Thermus thermophilus*. *Mol Cell* **52**, 135-145, doi:10.1016/j.molcel.2013.09.013 S1097-2765(13)00683-7 [pii] (2013).
- 42 Spilman, M. *et al.* Structure of an RNA silencing complex of the CRISPR-Cas immune system. *Mol Cell* **52**, 146-152, doi:10.1016/j.molcel.2013.09.008 S1097-2765(13)00678-3 [pii] (2013).
- 43 Rouillon, C. *et al.* Structure of the CRISPR interference complex CSM reveals key similarities with cascade. *Mol Cell* **52**, 124-134, doi:10.1016/j.molcel.2013.08.020 S1097-2765(13)00593-5 [pii] (2013).
- 44 Wiedenheft, B. *et al.* Structures of the RNA-guided surveillance complex from a bacterial immune system. *Nature* **477**, 486-489, doi:10.1038/nature10402 nature10402 [pii] (2011).
- 45 Koo, Y., Jung, D. K. & Bae, E. Crystal structure of *Streptococcus pyogenes* Csn2 reveals calcium-dependent conformational changes in its tertiary and quaternary structure. *PLoS One* **7**, e33401, doi:10.1371/journal.pone.0033401 PONE-D-11-18800 [pii] (2012).
- 46 Carte, J., Wang, R., Li, H., Terns, R. M. & Terns, M. P. Cas6 is an endoribonuclease that generates guide RNAs for invader defense in prokaryotes. *Genes Dev* **22**, 3489-3496 (2008).
- 47 Hale, C. R. *et al.* RNA-guided RNA cleavage by a CRISPR RNA-Cas protein complex. *Cell* **139**, 945-956 (2009).
- 48 Haurwitz, R. E., Jinek, M., Wiedenheft, B., Zhou, K. & Doudna, J. A. Sequence- and structure-specific RNA processing by a CRISPR endonuclease. *Science* **329**, 1355-1358 (2010).
- 49 Niewoehner, O., Jinek, M. & Doudna, J. A. Evolution of CRISPR RNA recognition and processing by Cas6 endonucleases. *Nucleic Acids Res* **42**, 1341-1353, doi:10.1093/nar/gkt922 gkt922 [pii] (2014).
- 50 Reeks, J. *et al.* Structure of the archaeal Cascade subunit Csa5: relating the small subunits of CRISPR effector complexes. *RNA Biol* **10**, 762-769, doi:10.4161/rna.23854 23854 [pii] (2013).
- 51 Sashital, D. G., Wiedenheft, B. & Doudna, J. A. Mechanism of foreign DNA selection in a bacterial adaptive immune system. *Mol Cell* **46**, 606-615, doi:10.1016/j.molcel.2012.03.020 S1097-2765(12)00227-4 [pii] (2012).
- 52 van Duijn, E. *et al.* Native tandem and ion mobility mass spectrometry highlight structural and modular similarities in clustered-regularly-interspaced shot-palindromic-repeats (CRISPR)-associated protein complexes from *Escherichia coli* and *Pseudomonas aeruginosa*. *Mol Cell Proteomics* **11**, 1430-1441, doi:10.1074/mcp.M112.020263 M112.020263 [pii] (2012).

- 53 Zhang, J. *et al.* Structure and mechanism of the CMR complex for CRISPR-mediated antiviral immunity. *Mol Cell* **45**, 303-313, doi:10.1016/j.molcel.2011.12.013 S1097-2765(11)00957-9 [pii] (2012).
- 54 Barrangou, R. *et al.* CRISPR provides acquired resistance against viruses in prokaryotes. *Science* **315**, 1709-1712, doi:315/5819/1709 [pii] 10.1126/science.1138140 (2007).
- 55 Garneau, J. E. *et al.* The CRISPR/Cas bacterial immune system cleaves bacteriophage and plasmid DNA. *Nature* **468**, 67-71, doi:nature09523 [pii] 10.1038/nature09523 (2010).
- 56 Deltcheva, E. *et al.* CRISPR RNA maturation by trans-encoded small RNA and host factor RNase III. *Nature* **471**, 602-607, doi:10.1038/nature09886 nature09886 [pii] (2011).
- 57 Jinek, M. *et al.* A programmable dual-RNA-guided DNA endonuclease in adaptive bacterial immunity. *Science* **337**, 816-821, doi:10.1126/science.1225829 science.1225829 [pii] (2012).
- 58 Sapranaukas, R. *et al.* The *Streptococcus thermophilus* CRISPR/Cas system provides immunity in *Escherichia coli*. *Nucleic Acids Res* **39**, 9275-9282, doi:10.1093/nar/gkr606 gkr606 [pii] (2011).
- 59 Heler, R. *et al.* Cas9 specifies functional viral targets during CRISPR-Cas adaptation. *Nature* **519**, 199-202, doi:10.1038/nature14245 nature14245 [pii] (2015).
- 60 Wei, Y., Terns, R. M. & Terns, M. P. Cas9 function and host genome sampling in Type II-A CRISPR-Cas adaptation. *Genes Dev* **29**, 356-361, doi:10.1101/gad.257550.114 29/4/356 [pii] (2015).
- 61 Nishimasu, H. *et al.* Crystal structure of Cas9 in complex with guide RNA and target DNA. *Cell* **156**, 935-949, doi:10.1016/j.cell.2014.02.001 S0092-8674(14)00156-1 [pii] (2014).
- 62 Jinek, M. *et al.* Structures of Cas9 endonucleases reveal RNA-mediated conformational activation. *Science* **343**, 1247997, doi:10.1126/science.1247997 science.1247997 [pii] (2014).
- 63 Cocozaki, A. I. *et al.* Structure of the Cmr2 subunit of the CRISPR-Cas RNA silencing complex. *Structure* **20**, 545-553, doi:10.1016/j.str.2012.01.018 S0969-2126(12)00049-4 [pii] (2012).
- 64 Reeks, J., Naismith, J. H. & White, M. F. CRISPR interference: a structural perspective. *Biochem J* **453**, 155-166, doi:10.1042/BJ20130316 BJ20130316 [pii] (2013).
- 65 Burstein, D. *et al.* New CRISPR-Cas systems from uncultivated microbes. *Nature* **542**, 237-241, doi:10.1038/nature21059 nature21059 [pii] (2017).
- 66 Harrington, L. B. *et al.* Programmed DNA destruction by miniature CRISPR-Cas14 enzymes. *Science* **362**, 839-842, doi:10.1126/science.aav4294 (2018).
- 67 Yan, W. X. *et al.* Functionally diverse type V CRISPR-Cas systems. *Science* **eeav7271** (2018).
- 68 Zetsche, B. *et al.* Cpf1 Is a Single RNA-Guided Endonuclease of a Class 2 CRISPR-Cas System. *Cell* **163**, 759-771, doi:10.1016/j.cell.2015.09.038 S0092-8674(15)01200-3 [pii] (2015).
- 69 Fonfara, I., Richter, H., Bratovic, M., Le Rhun, A. & Charpentier, E. The CRISPR-associated DNA-cleaving enzyme Cpf1 also processes precursor CRISPR RNA. *Nature* **532**, 517-521, doi:10.1038/nature17945 nature17945 [pii] (2016).
- 70 Liu, L. *et al.* C2c1-sgRNA Complex Structure Reveals RNA-Guided DNA Cleavage Mechanism. *Mol Cell* **65**, 310-322, doi:S1097-2765(16)30813-9 [pii] 10.1016/j.molcel.2016.11.040 (2017).

- 71 Swarts, D. C., van der Oost, J. & Jinek, M. Structural Basis for Guide RNA Processing and Seed-Dependent DNA Targeting by CRISPR-Cas12a. *Mol Cell* **66**, 221-233 e224, doi:S1097-2765(17)30206-X [pii] 10.1016/j.molcel.2017.03.016 (2017).
- 72 Liu, J. J. *et al.* CasX enzymes comprise a distinct family of RNA-guided genome editors. *Nature* **566**, 218-223, doi:10.1038/s41586-019-0908-x (2019).
- 73 Abudayyeh, O. O. *et al.* C2c2 is a single-component programmable RNA-guided RNA-targeting CRISPR effector. *Science* **353**, aaf5573, doi:10.1126/science.aaf5573 aaf5573 [pii] science.aaf5573 [pii] (2016).
- 74 Smargon, A. A. *et al.* Cas13b Is a Type VI-B CRISPR-Associated RNA-Guided RNase Differentially Regulated by Accessory Proteins Csx27 and Csx28. *Mol Cell*, doi:S1097-2765(16)30866-8 [pii] 10.1016/j.molcel.2016.12.023 (2017).
- 75 Yan, W. X. *et al.* Cas13d Is a Compact RNA-Targeting Type VI CRISPR Effector Positively Modulated by a WYL-Domain-Containing Accessory Protein. *Mol Cell*, doi:S1097-2765(18)30173-4 [pii] 10.1016/j.molcel.2018.02.028 (2018).
- 76 Zhang, C. *et al.* Structural Basis for the RNA-Guided Ribonuclease Activity of CRISPR-Cas13d. *Cell* **175**, 212-223 e217, doi:10.1016/j.cell.2018.09.001 (2018).
- 77 East-Seletsky, A. *et al.* Two distinct RNase activities of CRISPR-C2c2 enable guide-RNA processing and RNA detection. *Nature*, doi:10.1038/nature19802 nature19802 [pii] (2016).
- 78 Zhang, B. *et al.* Two HEPN domains dictate CRISPR RNA maturation and target cleavage in Cas13d. *Nat Commun* **10**, 2544, doi:10.1038/s41467-019-10507-3 (2019).
- 79 Meeske, A. J., Nakandakari-Higa, S. & Marraffini, L. A. Cas13-induced cellular dormancy prevents the rise of CRISPR-resistant bacteriophage. *Nature* **570**, 241-245, doi:10.1038/s41586-019-1257-5 (2019).
- 80 Liu, L. *et al.* The Molecular Architecture for RNA-Guided RNA Cleavage by Cas13a. *Cell* **170**, 714-726 e710, doi:10.1016/j.cell.2017.06.050 (2017).
- 81 Liu, L. *et al.* Two Distant Catalytic Sites Are Responsible for C2c2 RNase Activities. *Cell* **168**, 121-134 (2017).
- 82 Knott, G. J. *et al.* Guide-bound structures of an RNA-targeting A-cleaving CRISPR-Cas13a enzyme. *Nat Struct Mol Biol* **24**, 825-833, doi:10.1038/nsmb.3466 (2017).
- 83 Zhang, B. *et al.* Structural insights into Cas13b-guided CRISPR RNA maturation and recognition. *Cell Res* **28**, 1198-1201, doi:10.1038/s41422-018-0109-4 (2018).

## **Supplementary Datasets**

All datasets are available at [ftp://ftp.ncbi.nih.gov/pub/wolf/\\_suppl/CRISPRclass19/](ftp://ftp.ncbi.nih.gov/pub/wolf/_suppl/CRISPRclass19/)

**Supplementary Dataset 1. Detailed annotation of CRISPR-Cas loci**

**Supplementary Dataset 2. Multiple alignments (profiles) used to search for Cas and ancillary proteins.**

**Supplementary Dataset 3. Detailed information and comments for 126 modules derived from network analysis**

**Supplementary Dataset 4. Phylogenetic trees for the following protein families:**

1. Cas1
2. Cas9
3. TnpB and Cas12F variants

**Supplementary Dataset 5. Detailed annotation of CRISPR-Cas loci corresponding to new subtypes and yet unclassified systems.**

**Supplementary Dataset 6. Distribution of CRISPR-Cas systems across prokaryotic diversity**
